# Supplementary material
Source: PubMed Central journal article supplement (PMC3321822)
Supplement: 11_360_Calissano_Suppl.pdf [file 11_360_Calissano_Suppl.pdf]

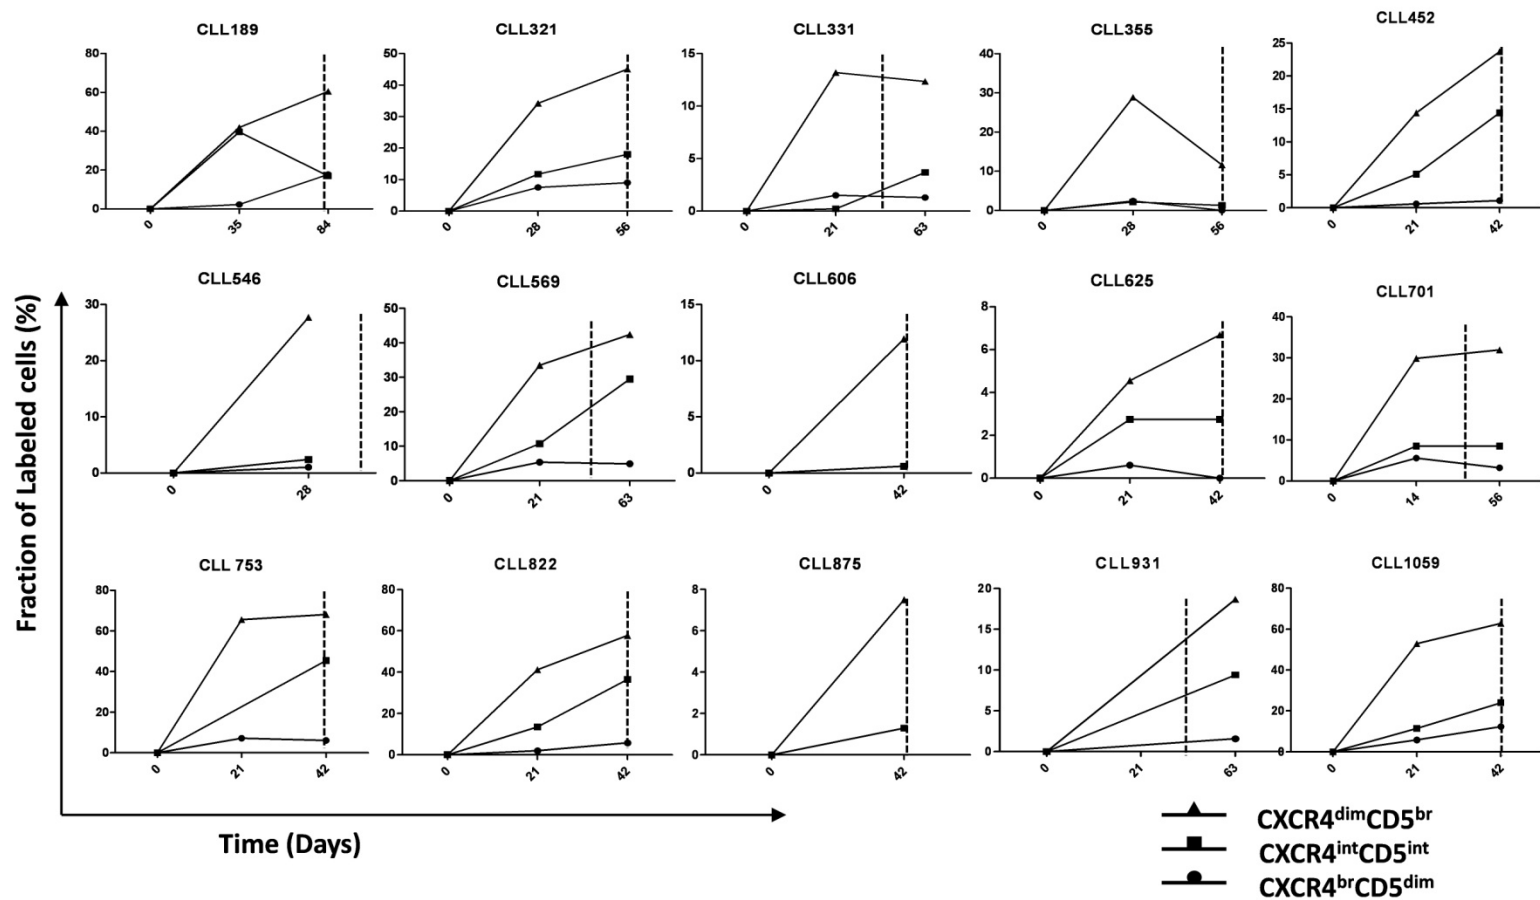

|                                                   | CLL 189 | CLL 321 | CLL 331 | CLL 355 | CLL 452 | CLL 546 | CLL 569 | CLL 606 | CLL 625 | CLL 701 | CLL 753 | CLL 822 | CLL 875 | CLL 931 | CLL 1059 |
|---------------------------------------------------|---------|---------|---------|---------|---------|---------|---------|---------|---------|---------|---------|---------|---------|---------|----------|
| <b>Maximum fraction of labeled cells observed</b> | 60,6%   | 45%     | 12,3%   | 28,8%   | 23,7%   | 27,7%   | 42,4%   | 11,9%   | 12,8%   | 31,9%   | 68,1%   | 57,7%   | 7,5%    | 18,7%   | 62,9%    |

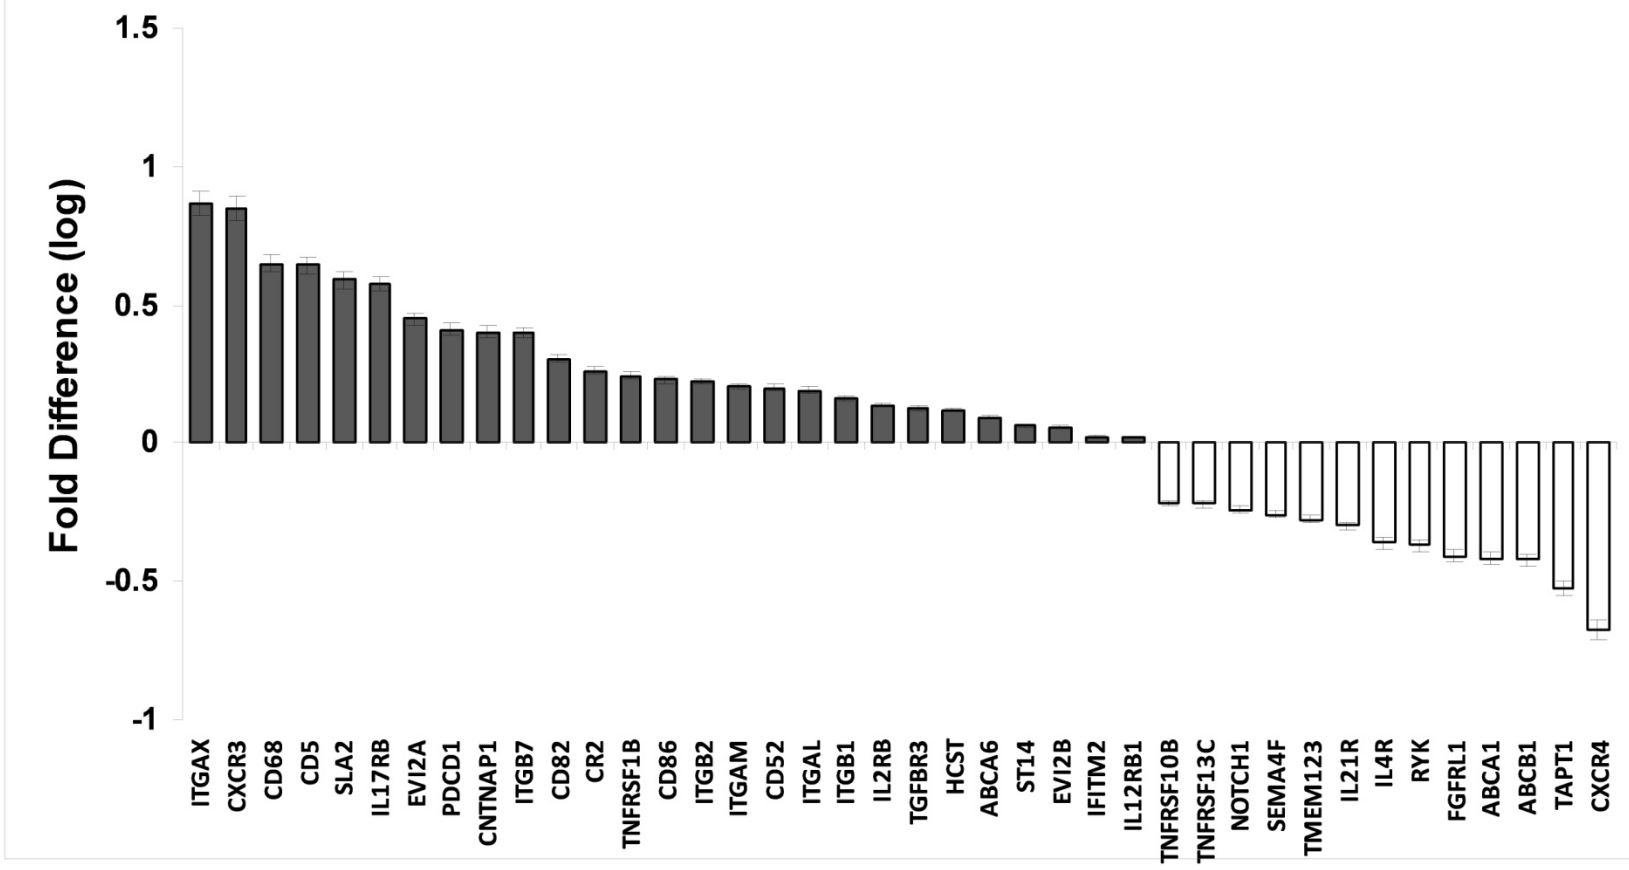

## Supplemental Figure Legends

**Supplemental Figure 1. *In vivo* kinetics of CXCR4<sup>dim</sup>CD5<sup>bright</sup>, CXCR4<sup>int</sup>CD5<sup>int</sup> and CXCR4<sup>bright</sup>CD5<sup>dim</sup> fractions of each CLL patient's clone.** Curves represent the fraction of labeled cells at the 2 time points studied (Figure 1E). Patients are displayed in numerical order. Note that a wide range of fraction of labeled cells (y axes) was observed among patients; for this reason, graphs have different scales. X axis represents time in days. Vertical dotted lines illustrate the end of <sup>2</sup>H<sub>2</sub>O consumption and vary based on the <sup>2</sup>H<sub>2</sub>O protocol followed by the patient. Note that for CLL 546 and CLL 606 we have only one time point measurement, a 1<sup>st</sup> and 2<sup>nd</sup> time point, respectively. In CLL 875, only CXCR4<sup>dim</sup>CD5<sup>br</sup> and CXCR4<sup>int</sup>CD5<sup>int</sup> fractions could be obtained. The box at the bottom indicates the calculated maximum fraction of labeled cells observed for each patient.

**Supplemental Figure 2. *Real-time quantitative PCR analyses of selected genes differentially expressed in proliferative and resting fractions.*** Plot shows the ratio of log transformed qRT-PCR values for genes in the two fractions. Black bars: genes higher in proliferative fraction; white bars: genes higher in resting fraction. °  $P < 0.05$ , \*  $P < 0.01$ , \*\*  $P < 0.001$

**Methodology.** Total RNA from the sorted CXCR4/CD5 fractions was isolated by RNeasy Mini kit (Qiagen) and first-strand cDNA synthesis made using High-capacity cDNA Reverse Transcription Kit (Applied Biosystems, Carlsbad, CA). RT-PCR was performed with TaqMan Low-Density Array microfluidics cards (Applied Biosystems) and an ABI Prism 7900 HT Sequence Detection System (Applied Biosystems) with cycling for 2 min at 50°C and 10 min at 95°C, followed by 40 cycles of 30s at 97°C and 1 min at 59.7°C. GAPDH and HPRT1 housekeeping genes served as endogenous controls for normalization. MicroFluidicCards were analyzed with RQ documents and the RQ Manager Software (comparative CT method).

**Supplemental Table 1**

*Complete list of genes found more expressed in Proliferative (A) and Resting (B) fractions of 9 CLL clones using a fold difference of >1.3 and a measure of difference of P < 0.01*

| Symbol                  | Fold Change | P value  | Entrez Gene Name                                                                                     | Location            | Type(s)                    |
|-------------------------|-------------|----------|------------------------------------------------------------------------------------------------------|---------------------|----------------------------|
| CD68                    | 4.028       | 6.24E-05 | CD68 molecule                                                                                        | Plasma Membrane     | other                      |
| GPR183                  | 3.621       | 2.17E-03 | G protein-coupled receptor 183                                                                       | Plasma Membrane     | G-protein coupled receptor |
| LY96                    | 3.478       | 8.95E-05 | lymphocyte antigen 96                                                                                | Plasma Membrane     | other                      |
| CCND2                   | 3.397       | 3.76E-04 | cyclin D2                                                                                            | Nucleus             | other                      |
| S100A4                  | 3.217       | 1.63E-04 | S100 calcium binding protein A4                                                                      | Cytoplasm           | other                      |
| ITGAX                   | 3.166       | 4.31E-04 | integrin, alpha X (complement component 3 receptor 4 subunit)                                        | Plasma Membrane     | other                      |
| CRIP1                   | 3.094       | 1.71E-03 | cysteine-rich protein 1 (intestinal)                                                                 | Cytoplasm           | other                      |
| GRN                     | 2.989       | 4.58E-04 | granulin                                                                                             | Extracellular Space | growth factor              |
| RNASE6                  | 2.947       | 2.15E-04 | ribonuclease, RNase A family, k6                                                                     | Extracellular Space | enzyme                     |
| ITGB7                   | 2.894       | 2.32E-04 | integrin, beta 7                                                                                     | Plasma Membrane     | transmembrane receptor     |
| EFCAB4A                 | 2.881       | 2.76E-03 | EF-hand calcium binding domain 4A                                                                    | unknown             | other                      |
| LGALS1                  | 2.770       | 9.71E-05 | lectin, galactoside-binding, soluble, 1                                                              | Extracellular Space | other                      |
| CD5                     | 2.625       | 2.18E-04 | CD5 molecule                                                                                         | Plasma Membrane     | transmembrane receptor     |
| CLECL1                  | 2.590       | 2.25E-04 | C-type lectin-like 1                                                                                 | Plasma Membrane     | other                      |
| IL17RB                  | 2.584       | 5.65E-04 | interleukin 17 receptor B                                                                            | Plasma Membrane     | transmembrane receptor     |
| LIME1                   | 2.536       | 1.75E-04 | Lck interacting transmembrane adaptor 1                                                              | Extracellular Space | other                      |
| RASSF2                  | 2.439       | 1.81E-04 | Ras association (RalGDS/AF-6) domain family member 2                                                 | Nucleus             | other                      |
| GAPDH                   | 2.424       | 5.27E-04 | glyceraldehyde-3-phosphate dehydrogenase                                                             | Cytoplasm           | enzyme                     |
| APIS2                   | 2.366       | 2.77E-05 | adaptor-related protein complex 1, sigma 2 subunit                                                   | Cytoplasm           | transporter                |
| CD82                    | 2.361       | 3.40E-04 | CD82 molecule                                                                                        | Plasma Membrane     | other                      |
| ACP5                    | 2.344       | 3.22E-04 | acid phosphatase 5, tartrate resistant                                                               | Cytoplasm           | phosphatase                |
| PLEK                    | 2.323       | 4.03E-04 | pleckstrin                                                                                           | Cytoplasm           | other                      |
| CPNE5                   | 2.288       | 1.18E-04 | copine V                                                                                             | Plasma Membrane     | other                      |
| DUS2L                   | 2.288       | 1.96E-05 | dihydrouridine synthase 2-like, SMM1 homolog (S. cerevisiae)                                         | Cytoplasm           | other                      |
| CXCR3                   | 2.285       | 2.36E-03 | chemokine (C-X-C motif) receptor 3                                                                   | Plasma Membrane     | G-protein coupled receptor |
| RAC2                    | 2.279       | 1.99E-04 | ras-related C3 botulinum toxin substrate 2 (rho family, small GTP binding protein Rac2)              | Cytoplasm           | enzyme                     |
| CD27                    | 2.251       | 1.08E-03 | CD27 molecule                                                                                        | Plasma Membrane     | transmembrane receptor     |
| DPYSL2                  | 2.236       | 1.31E-03 | dihydropyrimidinase-like 2                                                                           | Cytoplasm           | enzyme                     |
| PPM1M                   | 2.231       | 7.52E-04 | protein phosphatase, Mg2+/Mn2+ dependent, 1M                                                         | Nucleus             | phosphatase                |
| LTB                     | 2.176       | 3.75E-03 | lymphotoxin beta (TNF superfamily, member 3)                                                         | Extracellular Space | cytokine                   |
| NPM3                    | 2.171       | 3.19E-05 | nucleophosmin/nucleoplasmin 3                                                                        | Nucleus             | other                      |
| LOC653888               | 2.167       | 1.99E-04 | actin-related protein 2/3 complex subunit 1B-like                                                    | unknown             | other                      |
| CISD1                   | 2.158       | 1.28E-04 | CDGSH iron sulfur domain 1                                                                           | Cytoplasm           | other                      |
| TAGLN2                  | 2.144       | 1.49E-03 | transgelin 2                                                                                         | Cytoplasm           | other                      |
| TFDP1                   | 2.144       | 4.52E-04 | transcription factor Dp-1                                                                            | Nucleus             | transcription regulator    |
| EVI2A                   | 2.141       | 1.19E-03 | ecotropic viral integration site 2A                                                                  | Plasma Membrane     | transmembrane receptor     |
| ARHGAP44                | 2.137       | 4.79E-04 | Rho GTPase activating protein 44                                                                     | Cytoplasm           | other                      |
| GPX1                    | 2.133       | 3.41E-04 | glutathione peroxidase 1                                                                             | Cytoplasm           | enzyme                     |
| C4orf48                 | 2.114       | 7.60E-04 | chromosome 4 open reading frame 48                                                                   | unknown             | other                      |
| NAPSA                   | 2.108       | 1.69E-04 | napsin A aspartic peptidase                                                                          | Extracellular Space | peptidase                  |
| ACTG1                   | 2.095       | 3.85E-03 | actin, gamma 1                                                                                       | Cytoplasm           | other                      |
| ADAP1                   | 2.092       | 8.57E-03 | ArfGAP with dual PH domains 1                                                                        | Nucleus             | other                      |
| ZBTB32                  | 2.088       | 1.74E-03 | zinc finger and BTB domain containing 32                                                             | Nucleus             | transcription regulator    |
| ITGB2                   | 2.083       | 1.04E-03 | integrin, beta 2 (complement component 3 receptor 3 and 4 subunit)                                   | Plasma Membrane     | other                      |
| PLBD1                   | 2.078       | 2.35E-04 | phospholipase B domain containing 1                                                                  | Extracellular Space | other                      |
| DFNA5                   | 2.075       | 2.65E-04 | deafness, autosomal dominant 5                                                                       | unknown             | other                      |
| SUSD1                   | 2.040       | 4.08E-03 | sushi domain containing 1                                                                            | unknown             | other                      |
| PATL2                   | 2.038       | 7.06E-04 | protein associated with topoisomerase II homolog 2 (yeast)                                           | Cytoplasm           | other                      |
| CNN2                    | 2.016       | 2.34E-04 | calponin 2                                                                                           | Cytoplasm           | other                      |
| AHCY                    | 2.007       | 2.08E-04 | adenosylhomocysteinase                                                                               | Cytoplasm           | enzyme                     |
| BIN1                    | 2.003       | 3.44E-04 | bridging integrator 1                                                                                | Nucleus             | other                      |
| MTHFD2                  | 1.999       | 1.81E-04 | methylenetetrahydrofolate dehydrogenase (NADP+ dependent) 2, methenyltetrahydrofolate cyclohydrolase | Cytoplasm           | enzyme                     |
| HIST1H2BJ/<br>HIST1H2BK | 1.996       | 3.55E-03 | histone cluster 1, H2bk                                                                              | Nucleus             | other                      |
| SERPINF2                | 1.992       | 6.73E-04 | serpin peptidase inhibitor, clade F (alpha-2 antiplasmin,                                            | Extracellular Space | other                      |

|              |       |          |                                                                                                 |                     |                         |
|--------------|-------|----------|-------------------------------------------------------------------------------------------------|---------------------|-------------------------|
|              |       |          | pigment epithelium derived factor), member 2                                                    |                     |                         |
| CMTM3        | 1.990 | 5.70E-03 | CKLF-like MARVEL transmembrane domain containing 3                                              | Extracellular Space | cytokine                |
| PNOC         | 1.988 | 3.81E-04 | prepronociceptin                                                                                | Extracellular Space | other                   |
| LILRB4       | 1.985 | 1.63E-03 | leukocyte immunoglobulin-like receptor, subfamily B (with TM and ITIM domains), member 4        | unknown             | other                   |
| SIGLEC10     | 1.985 | 4.51E-04 | sialic acid binding Ig-like lectin 10                                                           | Plasma Membrane     | other                   |
| TLR10        | 1.984 | 5.75E-03 | toll-like receptor 10                                                                           | Plasma Membrane     | transmembrane receptor  |
| OAS1         | 1.983 | 9.23E-04 | 2',5'-oligoadenylate synthetase 1, 40/46kDa                                                     | Cytoplasm           | enzyme                  |
| RGS10        | 1.970 | 6.68E-04 | regulator of G-protein signaling 10                                                             | Cytoplasm           | other                   |
| SP140/SP140L | 1.967 | 3.89E-04 | SP140 nuclear body protein                                                                      | Nucleus             | transcription regulator |
| OBFC2A       | 1.965 | 2.28E-03 | oligonucleotide/oligosaccharide-binding fold containing 2A                                      | Nucleus             | other                   |
| NCRNA00152   | 1.961 | 2.93E-03 | non-protein coding RNA 152                                                                      | unknown             | other                   |
| AP2S1        | 1.959 | 2.56E-05 | adaptor-related protein complex 2, sigma 1 subunit                                              | Cytoplasm           | transporter             |
| PHFX         | 1.958 | 3.47E-04 | phosphate regulating endopeptidase homolog, X-linked                                            | Cytoplasm           | peptidase               |
| FERMT3       | 1.957 | 1.28E-04 | fermitin family member 3                                                                        | Cytoplasm           | enzyme                  |
| TP53I3       | 1.924 | 6.40E-04 | tumor protein p53 inducible protein 3                                                           | unknown             | enzyme                  |
| TLR9         | 1.923 | 2.39E-04 | toll-like receptor 9                                                                            | Plasma Membrane     | transmembrane receptor  |
| MYO1G        | 1.922 | 3.54E-04 | myosin 1G                                                                                       | Cytoplasm           | other                   |
| TAGLN        | 1.920 | 2.14E-04 | transgelin                                                                                      | Cytoplasm           | other                   |
| APBB1IP      | 1.917 | 6.97E-04 | amyloid beta (A4) precursor protein-binding, family B, member 1 interacting protein             | Cytoplasm           | other                   |
| PYCARD       | 1.917 | 1.32E-03 | PYD and CARD domain containing                                                                  | Cytoplasm           | transcription regulator |
| NDUFB5       | 1.909 | 2.26E-03 | NADH dehydrogenase (ubiquinone) 1 beta subcomplex, 5, 16kDa                                     | Cytoplasm           | enzyme                  |
| CASP4        | 1.906 | 2.55E-04 | caspase 4, apoptosis-related cysteine peptidase                                                 | Cytoplasm           | peptidase               |
| TYMP         | 1.897 | 8.67E-05 | thymidine phosphorylase                                                                         | Extracellular Space | growth factor           |
| SIDT2        | 1.886 | 4.09E-05 | SID1 transmembrane family, member 2                                                             | Cytoplasm           | other                   |
| SRGN         | 1.885 | 8.24E-04 | serglycin                                                                                       | Extracellular Space | other                   |
| MLLT11       | 1.881 | 1.71E-03 | myeloid/lymphoid or mixed-lineage leukemia (trithorax homolog, Drosophila); translocated to, 11 | unknown             | other                   |
| LSP1         | 1.879 | 5.06E-04 | lymphocyte-specific protein 1                                                                   | Cytoplasm           | other                   |
| ACYP2        | 1.878 | 1.07E-04 | acylphosphatase 2, muscle type                                                                  | Cytoplasm           | enzyme                  |
| TRPV2        | 1.875 | 4.44E-05 | transient receptor potential cation channel, subfamily V, member 2                              | Plasma Membrane     | ion channel             |
| PAPSS1       | 1.871 | 1.25E-04 | 3'-phosphoadenosine 5'-phosphosulfate synthase 1                                                | Cytoplasm           | enzyme                  |
| PTPN22       | 1.867 | 5.78E-04 | protein tyrosine phosphatase, non-receptor type 22 (lymphoid)                                   | Cytoplasm           | phosphatase             |
| RNH1         | 1.852 | 1.39E-03 | ribonuclease/angiogenin inhibitor 1                                                             | Cytoplasm           | other                   |
| SYTL1        | 1.851 | 4.94E-03 | synaptotagmin-like 1                                                                            | Cytoplasm           | enzyme                  |
| TWF2         | 1.851 | 2.18E-04 | twinfilin, actin-binding protein, homolog 2 (Drosophila)                                        | Cytoplasm           | kinase                  |
| FAM38A       | 1.842 | 5.42E-03 | family with sequence similarity 38, member A                                                    | unknown             | other                   |
| PARP3        | 1.836 | 7.28E-04 | poly (ADP-ribose) polymerase family, member 3                                                   | Nucleus             | enzyme                  |
| TPM3         | 1.833 | 2.06E-04 | tropomyosin 3                                                                                   | Cytoplasm           | other                   |
| IDH2         | 1.831 | 4.14E-05 | isocitrate dehydrogenase 2 (NADP+), mitochondrial                                               | Cytoplasm           | enzyme                  |
| VDAC3        | 1.830 | 1.75E-03 | voltage-dependent anion channel 3                                                               | Cytoplasm           | ion channel             |
| APEX1        | 1.826 | 3.59E-04 | APEX nuclease (multifunctional DNA repair enzyme) 1                                             | Nucleus             | enzyme                  |
| CNTNAP1      | 1.826 | 3.45E-04 | contactin associated protein 1                                                                  | Plasma Membrane     | other                   |
| ST14         | 1.822 | 5.56E-04 | suppression of tumorigenicity 14 (colon carcinoma)                                              | Plasma Membrane     | peptidase               |
| LPXN         | 1.817 | 2.59E-04 | leupaxin                                                                                        | Cytoplasm           | other                   |
| TKT          | 1.815 | 9.20E-06 | transketolase                                                                                   | Cytoplasm           | enzyme                  |
| RPS29        | 1.811 | 8.71E-04 | ribosomal protein S29                                                                           | Cytoplasm           | other                   |
| C17orf91     | 1.808 | 1.56E-04 | chromosome 17 open reading frame 91                                                             | unknown             | other                   |
| MT1F         | 1.807 | 1.60E-03 | metallothionein 1F                                                                              | Cytoplasm           | other                   |
| GLIPR2       | 1.802 | 1.67E-03 | GLI pathogenesis-related 2                                                                      | Cytoplasm           | other                   |
| LCP1         | 1.800 | 2.44E-04 | lymphocyte cytosolic protein 1 (L-plastin)                                                      | Cytoplasm           | other                   |
| ARPC1B       | 1.798 | 1.53E-03 | actin related protein 2/3 complex, subunit 1B, 41kDa                                            | Cytoplasm           | other                   |
| TGFBI        | 1.797 | 1.61E-03 | transforming growth factor, beta-induced, 68kDa                                                 | Extracellular Space | other                   |
| GYPC         | 1.796 | 1.87E-03 | glycophorin C (Gerbich blood group)                                                             | Plasma Membrane     | other                   |
| TALDO1       | 1.795 | 1.77E-03 | transaldolase 1                                                                                 | Cytoplasm           | enzyme                  |
| CCDC50       | 1.794 | 3.70E-04 | coiled-coil domain containing 50                                                                | Cytoplasm           | other                   |
| COCH         | 1.793 | 1.80E-03 | coagulation factor C homolog, cochlin (Limulus polyphemus)                                      | Extracellular Space | other                   |
| KIAA0391     | 1.792 | 1.25E-04 | KIAA0391                                                                                        | unknown             | other                   |
| FAM113B      | 1.789 | 5.50E-04 | family with sequence similarity 113, member B                                                   | unknown             | other                   |
| CD99         | 1.786 | 1.91E-04 | CD99 molecule                                                                                   | Plasma Membrane     | other                   |
| EV12B        | 1.783 | 3.56E-04 | ecotropic viral integration site 2B                                                             | Plasma Membrane     | other                   |
| PDLIM1       | 1.778 | 1.38E-03 | PDZ and LIM domain 1                                                                            | Cytoplasm           | transcription regulator |
| CLIC1        | 1.777 | 1.49E-04 | chloride intracellular channel 1                                                                | Nucleus             | ion channel             |
| GCHFR        | 1.776 | 1.77E-04 | GTP cyclohydrolase I feedback regulator                                                         | Cytoplasm           | other                   |
| FGD2         | 1.772 | 3.51E-04 | FYVE, RhoGEF and PH domain containing 2                                                         | Cytoplasm           | other                   |

|                           |       |          |                                                                                                        |                     |                         |
|---------------------------|-------|----------|--------------------------------------------------------------------------------------------------------|---------------------|-------------------------|
| RILPL2                    | 1.772 | 1.32E-03 | Rab interacting lysosomal protein-like 2                                                               | unknown             | other                   |
| AIM2                      | 1.770 | 2.12E-03 | absent in melanoma 2                                                                                   | Cytoplasm           | other                   |
| LDHB                      | 1.769 | 2.80E-04 | lactate dehydrogenase B                                                                                | Cytoplasm           | enzyme                  |
| DLEU1                     | 1.765 | 8.95E-03 | deleted in lymphocytic leukemia 1 (non-protein coding)                                                 | unknown             | other                   |
| RHBDL1                    | 1.765 | 8.67E-03 | rhomboid, veinlet-like 1 (Drosophila)                                                                  | Plasma Membrane     | peptidase               |
| TMED3                     | 1.762 | 1.73E-04 | transmembrane emp24 protein transport domain containing 3                                              | Cytoplasm           | transporter             |
| IFITM2                    | 1.760 | 1.03E-03 | interferon induced transmembrane protein 2 (1-8D)                                                      | Plasma Membrane     | other                   |
| GNAI2                     | 1.759 | 4.98E-04 | guanine nucleotide binding protein (G protein), alpha inhibiting activity polypeptide 2                | Plasma Membrane     | enzyme                  |
| GRAMD4                    | 1.759 | 7.62E-04 | GRAM domain containing 4                                                                               | unknown             | other                   |
| C1orf85                   | 1.757 | 1.03E-04 | chromosome 1 open reading frame 85                                                                     | Extracellular Space | other                   |
| HCST                      | 1.756 | 2.15E-03 | hematopoietic cell signal transducer                                                                   | Plasma Membrane     | other                   |
| HMOX1                     | 1.756 | 1.35E-04 | heme oxygenase (decycling) 1                                                                           | Cytoplasm           | enzyme                  |
| SAMSN1                    | 1.755 | 1.11E-03 | SAM domain, SH3 domain and nuclear localization signals 1                                              | Nucleus             | other                   |
| HIGD2A                    | 1.754 | 3.40E-06 | HIG1 hypoxia inducible domain family, member 2A                                                        | Cytoplasm           | other                   |
| PCCB                      | 1.750 | 6.70E-05 | propionyl CoA carboxylase, beta polypeptide                                                            | Cytoplasm           | enzyme                  |
| GAPT                      | 1.745 | 6.46E-03 | GRB2-binding adaptor protein, transmembrane                                                            | unknown             | other                   |
| CD52                      | 1.744 | 2.31E-03 | CD52 molecule                                                                                          | Plasma Membrane     | other                   |
| CAPNS1                    | 1.734 | 5.07E-04 | calpain, small subunit 1                                                                               | Cytoplasm           | peptidase               |
| CORO1B                    | 1.734 | 6.32E-04 | coronin, actin binding protein, 1B                                                                     | Cytoplasm           | other                   |
| VAMP8                     | 1.721 | 3.03E-04 | vesicle-associated membrane protein 8 (endobrevin)                                                     | Plasma Membrane     | other                   |
| CD151                     | 1.715 | 2.95E-03 | CD151 molecule (Raph blood group)                                                                      | Plasma Membrane     | other                   |
| SYT11                     | 1.712 | 6.08E-03 | synaptotagmin XI                                                                                       | Cytoplasm           | transporter             |
| ABCA6                     | 1.710 | 6.79E-04 | ATP-binding cassette, sub-family A (ABC1), member 6                                                    | Plasma Membrane     | transporter             |
| FABP5                     | 1.702 | 1.40E-04 | fatty acid binding protein 5 (psoriasis-associated)                                                    | Cytoplasm           | transporter             |
| ALDH5A1                   | 1.701 | 3.16E-04 | aldehyde dehydrogenase 5 family, member A1                                                             | Cytoplasm           | enzyme                  |
| IMMP2L                    | 1.700 | 4.17E-04 | IMP2 inner mitochondrial membrane peptidase-like (S. cerevisiae)                                       | Cytoplasm           | peptidase               |
| NME1                      | 1.698 | 1.95E-03 | non-metastatic cells 1, protein (NM23A) expressed in                                                   | Nucleus             | kinase                  |
| ITGAL                     | 1.694 | 1.42E-04 | integrin, alpha L (antigen CD11A (p180), lymphocyte function-associated antigen 1; alpha polypeptide)  | Plasma Membrane     | other                   |
| MXD4                      | 1.694 | 5.24E-05 | MAX dimerization protein 4                                                                             | Nucleus             | transcription regulator |
| G6PD                      | 1.691 | 3.66E-04 | glucose-6-phosphate dehydrogenase                                                                      | Cytoplasm           | enzyme                  |
| PFN1                      | 1.689 | 5.82E-04 | profilin 1                                                                                             | Cytoplasm           | other                   |
| GMDS                      | 1.688 | 1.07E-03 | GDP-mannose 4,6-dehydratase                                                                            | Cytoplasm           | enzyme                  |
| SRGAP3                    | 1.687 | 3.53E-05 | SLIT-ROBO Rho GTPase activating protein 3                                                              | Cytoplasm           | other                   |
| SGPP2                     | 1.683 | 1.68E-03 | sphingosine-1-phosphate phosphatase 2                                                                  | Cytoplasm           | phosphatase             |
| C6orf129                  | 1.682 | 3.37E-04 | chromosome 6 open reading frame 129                                                                    | unknown             | other                   |
| UBE2E2                    | 1.682 | 8.99E-04 | ubiquitin-conjugating enzyme E2E 2 (UBC4/5 homolog, yeast)                                             | Cytoplasm           | enzyme                  |
| C2orf79                   | 1.681 | 1.58E-04 | chromosome 2 open reading frame 79                                                                     | unknown             | other                   |
| KYNU                      | 1.681 | 9.20E-04 | kynureninase                                                                                           | Cytoplasm           | enzyme                  |
| CEACAM1 (includes others) | 1.680 | 6.08E-03 | carcinoembryonic antigen-related cell adhesion molecule 1 (biliary glycoprotein)                       | Plasma Membrane     | transmembrane receptor  |
| FAM89B                    | 1.676 | 4.15E-04 | family with sequence similarity 89, member B                                                           | unknown             | other                   |
| CAPG                      | 1.673 | 7.78E-05 | capping protein (actin filament), gelsolin-like                                                        | Nucleus             | other                   |
| PARVB                     | 1.673 | 1.70E-03 | parvin, beta                                                                                           | Cytoplasm           | other                   |
| SPATS2L                   | 1.671 | 7.93E-03 | spermatogenesis associated, serine-rich 2-like                                                         | unknown             | other                   |
| CTSZ                      | 1.670 | 1.51E-03 | cathepsin Z                                                                                            | Cytoplasm           | peptidase               |
| CYFIP1                    | 1.669 | 1.45E-03 | cytoplasmic FMR1 interacting protein 1                                                                 | Cytoplasm           | other                   |
| LAMTOR2                   | 1.669 | 1.05E-04 | late endosomal/lysosomal adaptor, MAPK and MTOR activator 2                                            | Cytoplasm           | other                   |
| PCK2                      | 1.669 | 9.08E-05 | phosphoenolpyruvate carboxykinase 2 (mitochondrial)                                                    | Cytoplasm           | kinase                  |
| SLC35B2                   | 1.668 | 2.58E-03 | solute carrier family 35, member B2                                                                    | Cytoplasm           | transporter             |
| ATL1                      | 1.667 | 2.44E-03 | atlastin GTPase 1                                                                                      | Cytoplasm           | enzyme                  |
| CYBASC3                   | 1.662 | 2.95E-03 | cytochrome b, ascorbate dependent 3                                                                    | unknown             | other                   |
| hCG 27695                 | 1.662 | 1.36E-03 | ribosomal protein L13a pseudogene 20                                                                   | unknown             | other                   |
| TPI1                      | 1.661 | 1.22E-04 | triosephosphate isomerase 1                                                                            | Cytoplasm           | enzyme                  |
| COMMD8                    | 1.660 | 2.24E-04 | COMM domain containing 8                                                                               | unknown             | other                   |
| GBP2                      | 1.658 | 8.83E-03 | guanylate binding protein 2, interferon-inducible                                                      | Cytoplasm           | enzyme                  |
| BZW2                      | 1.657 | 8.09E-04 | basic leucine zipper and W2 domains 2                                                                  | Cytoplasm           | translation regulator   |
| C9orf46                   | 1.655 | 6.41E-04 | chromosome 9 open reading frame 46                                                                     | Cytoplasm           | other                   |
| IMPDH2                    | 1.653 | 1.01E-04 | IMP (inosine 5'-monophosphate) dehydrogenase 2                                                         | Cytoplasm           | enzyme                  |
| IL18BP                    | 1.651 | 3.18E-03 | interleukin 18 binding protein                                                                         | Extracellular Space | other                   |
| SH3BGR13                  | 1.651 | 1.37E-03 | SH3 domain binding glutamic acid-rich protein like 3                                                   | Nucleus             | other                   |
| PDCD1                     | 1.650 | 6.28E-04 | programmed cell death 1                                                                                | Plasma Membrane     | phosphatase             |
| TXN                       | 1.650 | 1.19E-04 | thioredoxin                                                                                            | Cytoplasm           | enzyme                  |
| PECAM1                    | 1.648 | 1.96E-03 | platelet/endothelial cell adhesion molecule                                                            | Plasma Membrane     | other                   |
| SERPINF1                  | 1.647 | 4.11E-03 | serpin peptidase inhibitor, clade F (alpha-2 antiplasmin, pigment epithelium derived factor), member 1 | Extracellular Space | other                   |
| CTSA                      | 1.646 | 1.51E-03 | cathepsin A                                                                                            | Cytoplasm           | peptidase               |

|           |       |          |                                                                                              |                     |                         |
|-----------|-------|----------|----------------------------------------------------------------------------------------------|---------------------|-------------------------|
| TRAPPC1   | 1.646 | 1.95E-03 | trafficking protein particle complex 1                                                       | Cytoplasm           | other                   |
| ENTPD1    | 1.645 | 5.78E-03 | ectonucleoside triphosphate diphosphohydrolase 1                                             | Plasma Membrane     | enzyme                  |
| ETFB      | 1.645 | 1.85E-04 | electron-transfer-flavoprotein, beta polypeptide                                             | Cytoplasm           | transporter             |
| ITGB1     | 1.645 | 1.32E-03 | integrin, beta 1 (fibronectin receptor, beta polypeptide, antigen CD29 includes MDF2, MSK12) | Plasma Membrane     | transmembrane receptor  |
| PKM2      | 1.645 | 2.25E-03 | pyruvate kinase, muscle                                                                      | Cytoplasm           | kinase                  |
| MAN2B1    | 1.644 | 4.36E-04 | mannosidase, alpha, class 2B, member 1                                                       | Cytoplasm           | enzyme                  |
| ANXA2     | 1.641 | 1.35E-03 | annexin A2                                                                                   | Plasma Membrane     | other                   |
| KIAA1949  | 1.637 | 2.18E-05 | KIAA1949                                                                                     | unknown             | other                   |
| APOBEC3G  | 1.635 | 1.12E-03 | apolipoprotein B mRNA editing enzyme, catalytic polypeptide-like 3G                          | Nucleus             | enzyme                  |
| PEA15     | 1.627 | 2.65E-03 | phosphoprotein enriched in astrocytes 15                                                     | Cytoplasm           | transporter             |
| NCF4      | 1.624 | 4.92E-04 | neutrophil cytosolic factor 4, 40kDa                                                         | Cytoplasm           | enzyme                  |
| TRIM69    | 1.624 | 4.99E-03 | tripartite motif containing 69                                                               | unknown             | other                   |
| SYBU      | 1.623 | 9.93E-04 | syntabulin (syntaxin-interacting)                                                            | unknown             | other                   |
| CUTA      | 1.622 | 1.95E-04 | cutA divalent cation tolerance homolog (E. coli)                                             | unknown             | other                   |
| PGLS      | 1.622 | 4.86E-06 | 6-phosphogluconolactonase                                                                    | Cytoplasm           | enzyme                  |
| ADAM8     | 1.620 | 5.74E-04 | ADAM metalloproteinase domain 8                                                              | Plasma Membrane     | peptidase               |
| IGBP1     | 1.620 | 3.16E-04 | immunoglobulin (CD79A) binding protein 1                                                     | Cytoplasm           | phosphatase             |
| ITGAM     | 1.619 | 8.20E-03 | integrin, alpha M (complement component 3 receptor 3 subunit)                                | Plasma Membrane     | other                   |
| ATP5F1    | 1.617 | 3.13E-04 | ATP synthase, H+ transporting, mitochondrial Fo complex, subunit B1                          | Cytoplasm           | transporter             |
| FIBP      | 1.615 | 1.61E-03 | fibroblast growth factor (acidic) intracellular binding protein                              | Nucleus             | other                   |
| MAP4K1    | 1.615 | 1.97E-03 | mitogen-activated protein kinase kinase kinase kinase 1                                      | Cytoplasm           | kinase                  |
| SH3BP1    | 1.614 | 1.31E-03 | SH3-domain binding protein 1                                                                 | unknown             | other                   |
| MAPRE2    | 1.612 | 3.10E-03 | microtubule-associated protein, RP/EB family, member 2                                       | Cytoplasm           | other                   |
| LOC388564 | 1.609 | 2.18E-04 | hypothetical protein LOC388564                                                               | unknown             | other                   |
| TMEM149   | 1.603 | 1.03E-03 | transmembrane protein 149                                                                    | unknown             | other                   |
| BCAR3     | 1.601 | 1.47E-03 | breast cancer anti-estrogen resistance 3                                                     | Cytoplasm           | other                   |
| RPL34     | 1.600 | 4.13E-03 | ribosomal protein L34                                                                        | Cytoplasm           | other                   |
| TGFBR3    | 1.599 | 4.17E-03 | transforming growth factor, beta receptor III                                                | Plasma Membrane     | kinase                  |
| KIAA1407  | 1.598 | 5.81E-03 | KIAA1407                                                                                     | unknown             | other                   |
| C1orf186  | 1.596 | 5.45E-04 | chromosome 1 open reading frame 186                                                          | unknown             | other                   |
| S100A11   | 1.596 | 2.07E-03 | S100 calcium binding protein A11                                                             | Cytoplasm           | other                   |
| ATP6V1D   | 1.595 | 4.49E-04 | ATPase, H+ transporting, lysosomal 34kDa, V1 subunit D                                       | Cytoplasm           | transporter             |
| EPST11    | 1.595 | 4.16E-03 | epithelial stromal interaction 1 (breast)                                                    | unknown             | other                   |
| RGS19     | 1.595 | 2.02E-03 | regulator of G-protein signaling 19                                                          | Cytoplasm           | other                   |
| ADSL      | 1.593 | 4.40E-04 | adenylosuccinate lyase                                                                       | Cytoplasm           | enzyme                  |
| LDHA      | 1.593 | 2.71E-04 | lactate dehydrogenase A                                                                      | Cytoplasm           | enzyme                  |
| ASIP      | 1.592 | 1.84E-03 | agouti signaling protein                                                                     | Extracellular Space | other                   |
| C6orf108  | 1.592 | 9.35E-03 | chromosome 6 open reading frame 108                                                          | Nucleus             | other                   |
| CTSC      | 1.592 | 5.79E-04 | cathepsin C                                                                                  | Cytoplasm           | peptidase               |
| ARID3A    | 1.590 | 6.35E-03 | AT rich interactive domain 3A (BRIGHT-like)                                                  | Nucleus             | transcription regulator |
| NCR3      | 1.590 | 1.80E-03 | natural cytotoxicity triggering receptor 3                                                   | Plasma Membrane     | transmembrane receptor  |
| CAST      | 1.588 | 3.43E-05 | calpastatin                                                                                  | Cytoplasm           | peptidase               |
| LAT2      | 1.587 | 8.47E-04 | linker for activation of T cells family, member 2                                            | Plasma Membrane     | other                   |
| ARPC4     | 1.584 | 3.13E-04 | actin related protein 2/3 complex, subunit 4, 20kDa                                          | unknown             | other                   |
| OSTF1     | 1.584 | 9.12E-04 | osteoclast stimulating factor 1                                                              | Nucleus             | transcription regulator |
| VIM       | 1.584 | 7.53E-04 | vimentin                                                                                     | Cytoplasm           | other                   |
| PGAM1     | 1.583 | 1.77E-03 | phosphoglycerate mutase 1 (brain)                                                            | Cytoplasm           | phosphatase             |
| HLA-DPA1  | 1.582 | 1.11E-03 | major histocompatibility complex, class II, DP alpha 1                                       | Plasma Membrane     | transmembrane receptor  |
| CLEC4C    | 1.579 | 8.75E-03 | C-type lectin domain family 4, member C                                                      | Plasma Membrane     | other                   |
| HLA-DPB1  | 1.579 | 5.90E-03 | major histocompatibility complex, class II, DP beta 1                                        | Plasma Membrane     | transmembrane receptor  |
| NOP10     | 1.579 | 2.42E-04 | NOP10 ribonucleoprotein homolog (yeast)                                                      | Nucleus             | other                   |
| GLRX3     | 1.576 | 1.36E-03 | glutaredoxin 3                                                                               | Cytoplasm           | enzyme                  |
| LRRC33    | 1.573 | 2.37E-03 | leucine rich repeat containing 33                                                            | unknown             | other                   |
| NME1-NME2 | 1.573 | 3.30E-04 | NME1-NME2 readthrough                                                                        | Cytoplasm           | other                   |
| C17orf87  | 1.572 | 2.59E-04 | chromosome 17 open reading frame 87                                                          | unknown             | other                   |
| CR2       | 1.572 | 1.33E-03 | complement component (3d/Epstein Barr virus) receptor 2                                      | Plasma Membrane     | transmembrane receptor  |
| UCP2      | 1.572 | 2.52E-03 | uncoupling protein 2 (mitochondrial, proton carrier)                                         | Cytoplasm           | transporter             |
| VOPP1     | 1.572 | 6.08E-03 | vesicular, overexpressed in cancer, prosurvival protein 1                                    | Nucleus             | other                   |
| TOX2      | 1.569 | 1.73E-03 | TOX high mobility group box family member 2                                                  | Nucleus             | transcription regulator |
| LTK       | 1.566 | 4.15E-03 | leukocyte receptor tyrosine kinase                                                           | Plasma Membrane     | kinase                  |
| RHOC      | 1.566 | 2.64E-03 | ras homolog gene family, member C                                                            | Plasma Membrane     | enzyme                  |
| VMP1      | 1.566 | 9.66E-03 | vacuole membrane protein 1                                                                   | Plasma Membrane     | other                   |
| PGAM4     | 1.564 | 7.26E-04 | phosphoglycerate mutase family member 4                                                      | unknown             | phosphatase             |
| GSTP1     | 1.559 | 3.24E-03 | glutathione S-transferase pi 1                                                               | Cytoplasm           | enzyme                  |
| HLA-DQA1  | 1.559 | 1.59E-03 | major histocompatibility complex, class II, DQ alpha 1                                       | Plasma Membrane     | transmembrane           |

|           |       |          |                                                                                                      |                     |                            |
|-----------|-------|----------|------------------------------------------------------------------------------------------------------|---------------------|----------------------------|
|           |       |          |                                                                                                      |                     | receptor                   |
| TOP1MT    | 1.559 | 8.53E-04 | topoisomerase (DNA) I, mitochondrial                                                                 | Cytoplasm           | enzyme                     |
| CYSLTR1   | 1.558 | 5.37E-03 | cysteinyl leukotriene receptor 1                                                                     | Plasma Membrane     | G-protein coupled receptor |
| EC11      | 1.558 | 3.12E-04 | enoyl-CoA delta isomerase 1                                                                          | Cytoplasm           | enzyme                     |
| OXA1L     | 1.556 | 9.79E-04 | oxidase (cytochrome c) assembly 1-like                                                               | Cytoplasm           | enzyme                     |
| PARVG     | 1.556 | 5.32E-03 | parvin, gamma                                                                                        | Cytoplasm           | other                      |
| CAT       | 1.555 | 7.24E-04 | catalase                                                                                             | Cytoplasm           | enzyme                     |
| FA2H      | 1.555 | 1.29E-03 | fatty acid 2-hydroxylase                                                                             | unknown             | enzyme                     |
| CES4A     | 1.554 | 3.80E-04 | carboxylesterase 4A                                                                                  | Extracellular Space | enzyme                     |
| HMGA1     | 1.554 | 4.95E-04 | high mobility group AT-hook 1                                                                        | Nucleus             | transcription regulator    |
| ABCA9     | 1.553 | 1.63E-03 | ATP-binding cassette, sub-family A (ABC1), member 9                                                  | Cytoplasm           | transporter                |
| COMMD10   | 1.553 | 9.89E-04 | COMM domain containing 10                                                                            | unknown             | other                      |
| HYAL3     | 1.553 | 8.00E-05 | hyaluronoglucosaminidase 3                                                                           | Cytoplasm           | enzyme                     |
| C4orf14   | 1.551 | 7.33E-04 | chromosome 4 open reading frame 14                                                                   | Cytoplasm           | other                      |
| DIAPH1    | 1.550 | 1.22E-04 | diaphanous homolog 1 (Drosophila)                                                                    | Cytoplasm           | other                      |
| SASH3     | 1.550 | 7.16E-04 | SAM and SH3 domain containing 3                                                                      | Cytoplasm           | other                      |
| MRPL51    | 1.548 | 2.79E-05 | mitochondrial ribosomal protein L51                                                                  | Cytoplasm           | other                      |
| S100A6    | 1.547 | 8.04E-04 | S100 calcium binding protein A6                                                                      | Cytoplasm           | transporter                |
| GCLC      | 1.546 | 3.85E-04 | glutamate-cysteine ligase, catalytic subunit                                                         | Cytoplasm           | enzyme                     |
| AGMAT     | 1.545 | 3.43E-04 | agmatine ureohydrolase (agmatinase)                                                                  | Cytoplasm           | enzyme                     |
| POLD4     | 1.545 | 2.32E-03 | polymerase (DNA-directed), delta 4                                                                   | Nucleus             | enzyme                     |
| ECHS1     | 1.543 | 3.08E-03 | enoyl CoA hydratase, short chain, 1, mitochondrial                                                   | Cytoplasm           | enzyme                     |
| SERPINB8  | 1.543 | 1.26E-03 | serpin peptidase inhibitor, clade B (ovalbumin), member 8                                            | Cytoplasm           | other                      |
| TSPO      | 1.543 | 1.21E-03 | translocator protein (18kDa)                                                                         | Cytoplasm           | transmembrane receptor     |
| PIGR      | 1.540 | 4.90E-03 | polymeric immunoglobulin receptor                                                                    | Plasma Membrane     | transporter                |
| BLMH      | 1.538 | 1.30E-06 | bleomycin hydrolase                                                                                  | Cytoplasm           | peptidase                  |
| C14orf159 | 1.538 | 6.79E-04 | chromosome 14 open reading frame 159                                                                 | Cytoplasm           | other                      |
| ELMO1     | 1.536 | 4.57E-03 | engulfment and cell motility 1                                                                       | Cytoplasm           | other                      |
| CSTB      | 1.535 | 3.61E-03 | cystatin B (stefin B)                                                                                | Cytoplasm           | other                      |
| HINT1     | 1.535 | 1.35E-03 | histidine triad nucleotide binding protein 1                                                         | Nucleus             | enzyme                     |
| WSB2      | 1.535 | 3.53E-04 | WD repeat and SOCS box containing 2                                                                  | unknown             | other                      |
| COMMD1    | 1.534 | 1.77E-04 | copper metabolism (Murr1) domain containing 1                                                        | Nucleus             | transporter                |
| MGST2     | 1.534 | 8.57E-03 | microsomal glutathione S-transferase 2                                                               | Cytoplasm           | enzyme                     |
| BAX       | 1.531 | 3.75E-04 | BCL2-associated X protein                                                                            | Cytoplasm           | other                      |
| C6orf115  | 1.528 | 4.22E-04 | chromosome 6 open reading frame 115                                                                  | unknown             | other                      |
| APOBEC3H  | 1.527 | 1.04E-04 | apolipoprotein B mRNA editing enzyme, catalytic polypeptide-like 3H                                  | Cytoplasm           | other                      |
| C11orf1   | 1.527 | 1.03E-03 | chromosome 11 open reading frame 1                                                                   | Nucleus             | other                      |
| SEPW1     | 1.527 | 2.11E-04 | selenoprotein W, 1                                                                                   | Cytoplasm           | enzyme                     |
| NINJ2     | 1.526 | 8.11E-04 | ninjurin 2                                                                                           | Plasma Membrane     | other                      |
| BTK       | 1.525 | 5.89E-03 | Bruton agammaglobulinemia tyrosine kinase                                                            | Cytoplasm           | kinase                     |
| HSPA8     | 1.525 | 5.78E-03 | heat shock 70kDa protein 8                                                                           | Cytoplasm           | enzyme                     |
| TPP1      | 1.525 | 1.64E-03 | tripeptidyl peptidase I                                                                              | Cytoplasm           | peptidase                  |
| EIF3M     | 1.524 | 1.47E-03 | eukaryotic translation initiation factor 3, subunit M                                                | unknown             | other                      |
| PNPO      | 1.524 | 7.48E-05 | pyridoxamine 5'-phosphate oxidase                                                                    | Cytoplasm           | enzyme                     |
| CSNK2A2   | 1.523 | 5.92E-04 | casein kinase 2, alpha prime polypeptide                                                             | Cytoplasm           | kinase                     |
| VCP       | 1.522 | 1.90E-03 | valosin containing protein                                                                           | Cytoplasm           | enzyme                     |
| ACTB      | 1.521 | 6.18E-04 | actin, beta                                                                                          | Cytoplasm           | other                      |
| SDHD      | 1.520 | 6.37E-04 | succinate dehydrogenase complex, subunit D, integral membrane protein                                | Cytoplasm           | enzyme                     |
| COMMD4    | 1.518 | 4.17E-04 | COMM domain containing 4                                                                             | Cytoplasm           | other                      |
| NHLRC2    | 1.518 | 4.97E-04 | NHL repeat containing 2                                                                              | unknown             | enzyme                     |
| KIAA2013  | 1.517 | 1.60E-03 | KIAA2013                                                                                             | unknown             | other                      |
| ECH1      | 1.516 | 1.40E-03 | enoyl CoA hydratase 1, peroxisomal                                                                   | Cytoplasm           | enzyme                     |
| SRD5A1    | 1.516 | 2.06E-05 | steroid-5-alpha-reductase, alpha polypeptide 1 (3-oxo-5-alpha-steroid delta 4-dehydrogenase alpha 1) | Cytoplasm           | enzyme                     |
| ERGIC3    | 1.515 | 1.02E-03 | ERGIC and golgi 3                                                                                    | Cytoplasm           | other                      |
| PAQR7     | 1.510 | 4.59E-04 | progesterin and adipoQ receptor family member VII                                                    | unknown             | other                      |
| SNRNP25   | 1.510 | 9.71E-04 | small nuclear ribonucleoprotein 25kDa (U11/U12)                                                      | Nucleus             | other                      |
| ERP29     | 1.509 | 3.56E-03 | endoplasmic reticulum protein 29                                                                     | Cytoplasm           | transporter                |
| MPEG1     | 1.508 | 3.81E-03 | macrophage expressed 1                                                                               | Cytoplasm           | other                      |
| PPARGC1B  | 1.508 | 1.26E-04 | peroxisome proliferator-activated receptor gamma, coactivator 1 beta                                 | Nucleus             | transcription regulator    |
| PLP2      | 1.507 | 1.60E-03 | proteolipid protein 2 (colonic epithelium-enriched)                                                  | Cytoplasm           | transporter                |
| APRT      | 1.506 | 9.82E-04 | adenine phosphoribosyltransferase                                                                    | Cytoplasm           | enzyme                     |
| VCL       | 1.506 | 2.85E-03 | vinculin                                                                                             | Plasma Membrane     | enzyme                     |
| ZNF362    | 1.506 | 9.57E-05 | zinc finger protein 362                                                                              | unknown             | other                      |
| ATG4C     | 1.504 | 2.35E-03 | ATG4 autophagy related 4 homolog C (S. cerevisiae)                                                   | Cytoplasm           | peptidase                  |
| MAPKAPK3  | 1.502 | 8.05E-04 | mitogen-activated protein kinase-activated protein kinase 3                                          | Nucleus             | kinase                     |
| ENO1      | 1.501 | 8.97E-04 | enolase 1, (alpha)                                                                                   | Cytoplasm           | transcription regulator    |
| ITM2C     | 1.501 | 3.72E-03 | integral membrane protein 2C                                                                         | Cytoplasm           | other                      |



|          |       |          |                                                                                             |                     |                         |
|----------|-------|----------|---------------------------------------------------------------------------------------------|---------------------|-------------------------|
| NDUFB2   | 1.501 | 1.04E-03 | NADH dehydrogenase (ubiquinone) 1 beta subcomplex, 2, 8kDa                                  | Cytoplasm           | enzyme                  |
| BCAS4    | 1.499 | 7.87E-04 | breast carcinoma amplified sequence 4                                                       | Cytoplasm           | other                   |
| PTEN     | 1.498 | 3.82E-03 | phosphatase and tensin homolog                                                              | Cytoplasm           | phosphatase             |
| ANKDD1A  | 1.497 | 3.02E-03 | ankyrin repeat and death domain containing 1A                                               | unknown             | other                   |
| ANTXR2   | 1.497 | 7.69E-03 | anthrax toxin receptor 2                                                                    | Plasma Membrane     | other                   |
| AP2M1    | 1.497 | 4.05E-03 | adaptor-related protein complex 2, mu 1 subunit                                             | Cytoplasm           | transporter             |
| SLC25A20 | 1.496 | 9.86E-04 | solute carrier family 25 (carnitine/acylcarnitine translocase), member 20                   | Cytoplasm           | transporter             |
| PGD      | 1.495 | 1.08E-03 | phosphogluconate dehydrogenase                                                              | Cytoplasm           | enzyme                  |
| RNF130   | 1.495 | 3.99E-04 | ring finger protein 130                                                                     | Cytoplasm           | peptidase               |
| ANXA5    | 1.492 | 2.77E-04 | annexin A5                                                                                  | Plasma Membrane     | other                   |
| DEPDC5   | 1.491 | 1.94E-03 | DEP domain containing 5                                                                     | unknown             | other                   |
| FKBP1A   | 1.491 | 1.64E-03 | FK506 binding protein 1A, 12kDa                                                             | Cytoplasm           | enzyme                  |
| OGDH     | 1.491 | 4.90E-04 | oxoglutarate (alpha-ketoglutarate) dehydrogenase (lipoamide)                                | Cytoplasm           | enzyme                  |
| SAMM50   | 1.491 | 1.97E-04 | sorting and assembly machinery component 50 homolog (S. cerevisiae)                         | Cytoplasm           | other                   |
| SERPINB1 | 1.491 | 4.86E-03 | serpin peptidase inhibitor, clade B (ovalbumin), member 1                                   | Cytoplasm           | other                   |
| SRM      | 1.490 | 4.29E-03 | spermidine synthase                                                                         | Cytoplasm           | enzyme                  |
| FMO4     | 1.489 | 1.51E-04 | flavin containing monooxygenase 4                                                           | Cytoplasm           | enzyme                  |
| TCEA1    | 1.489 | 3.40E-03 | transcription elongation factor A (SII), 1                                                  | Nucleus             | transcription regulator |
| TCEAL8   | 1.488 | 3.85E-05 | transcription elongation factor A (SII)-like 8                                              | unknown             | other                   |
| LTA      | 1.487 | 1.55E-04 | lymphotoxin alpha (TNF superfamily, member 1)                                               | Extracellular Space | cytokine                |
| PRCP     | 1.486 | 1.12E-03 | prolylcarboxypeptidase (angiotensinase C)                                                   | Cytoplasm           | peptidase               |
| NT5DC3   | 1.484 | 2.30E-04 | 5'-nucleotidase domain containing 3                                                         | unknown             | other                   |
| CTSB     | 1.483 | 5.40E-04 | cathepsin B                                                                                 | Cytoplasm           | peptidase               |
| C1QBP    | 1.482 | 5.77E-04 | complement component 1, q subcomponent binding protein                                      | Cytoplasm           | other                   |
| IFI27L2  | 1.482 | 1.88E-03 | interferon, alpha-inducible protein 27-like 2                                               | unknown             | other                   |
| KIF15    | 1.482 | 2.14E-03 | kinesin family member 15                                                                    | Nucleus             | other                   |
| TIGIT    | 1.482 | 1.39E-03 | T cell immunoreceptor with Ig and ITIM domains                                              | Plasma Membrane     | other                   |
| ARPC5    | 1.480 | 2.72E-04 | actin related protein 2/3 complex, subunit 5, 16kDa                                         | Cytoplasm           | other                   |
| NQO1     | 1.480 | 9.62E-04 | NAD(P)H dehydrogenase, quinone 1                                                            | Cytoplasm           | enzyme                  |
| PTPRCAP  | 1.480 | 4.98E-03 | protein tyrosine phosphatase, receptor type, C-associated protein                           | Plasma Membrane     | other                   |
| SLC25A5  | 1.480 | 3.98E-03 | solute carrier family 25 (mitochondrial carrier; adenine nucleotide translocator), member 5 | Cytoplasm           | transporter             |
| APOBEC3C | 1.479 | 5.47E-03 | apolipoprotein B mRNA editing enzyme, catalytic polypeptide-like 3C                         | unknown             | enzyme                  |
| NDUFS4   | 1.479 | 1.18E-04 | NADH dehydrogenase (ubiquinone) Fe-S protein 4, 18kDa (NADH-coenzyme Q reductase)           | Cytoplasm           | enzyme                  |
| ARPC3    | 1.478 | 2.26E-03 | actin related protein 2/3 complex, subunit 3, 21kDa                                         | Cytoplasm           | other                   |
| CYB5A    | 1.478 | 4.23E-03 | cytochrome b5 type A (microsomal)                                                           | Cytoplasm           | enzyme                  |
| CCNE1    | 1.477 | 7.62E-03 | cyclin E1                                                                                   | Nucleus             | transcription regulator |
| IL2RB    | 1.477 | 1.17E-03 | interleukin 2 receptor, beta                                                                | Plasma Membrane     | transmembrane receptor  |
| HMBS     | 1.476 | 2.53E-03 | hydroxymethylbilane synthase                                                                | Cytoplasm           | enzyme                  |
| UFC1     | 1.476 | 3.08E-04 | ubiquitin-fold modifier conjugating enzyme 1                                                | unknown             | enzyme                  |
| MIF4GD   | 1.475 | 3.56E-04 | MIF4G domain containing                                                                     | unknown             | other                   |
| SLA2     | 1.475 | 1.62E-03 | Src-like-adaptor 2                                                                          | Plasma Membrane     | other                   |
| ARSD     | 1.474 | 1.38E-03 | arylsulfatase D                                                                             | Cytoplasm           | enzyme                  |
| ATP5H    | 1.474 | 8.83E-04 | ATP synthase, H+ transporting, mitochondrial Fo complex, subunit d                          | unknown             | enzyme                  |
| C1orf97  | 1.474 | 1.57E-03 | chromosome 1 open reading frame 97                                                          | unknown             | other                   |
| TMEM159  | 1.474 | 3.98E-04 | transmembrane protein 159                                                                   | unknown             | other                   |
| ADAMTS6  | 1.473 | 3.03E-03 | ADAM metallopeptidase with thrombospondin type 1 motif, 6                                   | Extracellular Space | peptidase               |
| GPR137B  | 1.471 | 7.46E-05 | G protein-coupled receptor 137B                                                             | Plasma Membrane     | other                   |
| HPCAL1   | 1.471 | 1.88E-04 | hippocalcin-like 1                                                                          | Cytoplasm           | other                   |
| SYTL3    | 1.471 | 7.46E-04 | synaptotagmin-like 3                                                                        | Cytoplasm           | other                   |
| TMEM14A  | 1.470 | 2.75E-03 | transmembrane protein 14A                                                                   | unknown             | other                   |
| CKS2     | 1.469 | 9.89E-03 | CDC28 protein kinase regulatory subunit 2                                                   | unknown             | kinase                  |
| POLR1D   | 1.469 | 2.12E-05 | polymerase (RNA) I polypeptide D, 16kDa                                                     | Nucleus             | enzyme                  |
| TNFSF12  | 1.469 | 2.63E-03 | tumor necrosis factor (ligand) superfamily, member 12                                       | Extracellular Space | cytokine                |
| SERF2    | 1.468 | 3.89E-03 | small EDRK-rich factor 2                                                                    | unknown             | other                   |
| RAP1GDS1 | 1.466 | 5.07E-04 | RAP1, GTP-GDP dissociation stimulator 1                                                     | unknown             | other                   |
| HINT2    | 1.465 | 4.10E-04 | histidine triad nucleotide binding protein 2                                                | Cytoplasm           | other                   |
| STAMBPL1 | 1.464 | 7.16E-03 | STAM binding protein-like 1                                                                 | unknown             | other                   |
| MVP      | 1.463 | 5.22E-04 | major vault protein                                                                         | Nucleus             | other                   |
| FKBP1C   | 1.461 | 3.48E-04 | FK506 binding protein 1C                                                                    | unknown             | other                   |
| IRF5     | 1.461 | 1.76E-03 | interferon regulatory factor 5                                                              | Nucleus             | transcription regulator |
| SDF2     | 1.460 | 6.01E-04 | stromal cell-derived factor 2                                                               | Extracellular Space | enzyme                  |
| TRAF3IP2 | 1.460 | 8.24E-05 | TRAF3 interacting protein 2                                                                 | unknown             | other                   |

|            |       |          |                                                                                                               |                     |                         |
|------------|-------|----------|---------------------------------------------------------------------------------------------------------------|---------------------|-------------------------|
| ANO9       | 1.459 | 4.15E-03 | anoctamin 9                                                                                                   | unknown             | other                   |
| SND1       | 1.459 | 4.22E-04 | staphylococcal nuclease and tudor domain containing 1                                                         | Nucleus             | enzyme                  |
| TLN1       | 1.459 | 5.19E-03 | talin 1                                                                                                       | Plasma Membrane     | other                   |
| RPL23A     | 1.458 | 3.02E-05 | ribosomal protein L23a                                                                                        | Cytoplasm           | other                   |
| LCMT1      | 1.457 | 1.22E-05 | leucine carboxyl methyltransferase 1                                                                          | unknown             | enzyme                  |
| RPS21      | 1.456 | 4.66E-04 | ribosomal protein S21                                                                                         | Cytoplasm           | other                   |
| ALDOA      | 1.455 | 7.13E-03 | aldolase A, fructose-bisphosphate                                                                             | Cytoplasm           | enzyme                  |
| ATP6V0E1   | 1.453 | 7.59E-04 | ATPase, H <sup>+</sup> transporting, lysosomal 9kDa, V0 subunit e1                                            | Cytoplasm           | transporter             |
| MRPS11     | 1.453 | 1.65E-03 | mitochondrial ribosomal protein S11                                                                           | Cytoplasm           | other                   |
| HEATR5B    | 1.452 | 3.13E-03 | HEAT repeat containing 5B                                                                                     | unknown             | other                   |
| SLC15A3    | 1.452 | 1.10E-03 | solute carrier family 15, member 3                                                                            | Cytoplasm           | transporter             |
| AKR1A1     | 1.450 | 8.24E-03 | aldo-keto reductase family 1, member A1 (aldehyde reductase)                                                  | Cytoplasm           | enzyme                  |
| PPA1       | 1.450 | 5.52E-03 | pyrophosphatase (inorganic) 1                                                                                 | Cytoplasm           | enzyme                  |
| ARPC2      | 1.449 | 5.81E-05 | actin related protein 2/3 complex, subunit 2, 34kDa                                                           | Cytoplasm           | other                   |
| LGALS9     | 1.449 | 1.53E-03 | lectin, galactoside-binding, soluble, 9                                                                       | Extracellular Space | other                   |
| ZDHHC12    | 1.449 | 1.69E-03 | zinc finger, DHHC-type containing 12                                                                          | unknown             | other                   |
| GTF2H5     | 1.448 | 1.11E-03 | general transcription factor IIIH, polypeptide 5                                                              | Nucleus             | other                   |
| MRPL15     | 1.448 | 1.13E-03 | mitochondrial ribosomal protein L15                                                                           | Cytoplasm           | other                   |
| LOC647000  | 1.446 | 5.89E-03 | tubulin, beta pseudogene 2                                                                                    | unknown             | other                   |
| NTHL1      | 1.445 | 2.82E-04 | nth endonuclease III-like 1 (E. coli)                                                                         | Nucleus             | enzyme                  |
| PSMB2      | 1.445 | 8.26E-05 | proteasome (prosome, macropain) subunit, beta type, 2                                                         | Cytoplasm           | peptidase               |
| RBM20      | 1.445 | 5.06E-03 | RNA binding motif protein 20                                                                                  | unknown             | other                   |
| UBL7       | 1.445 | 2.38E-04 | ubiquitin-like 7 (bone marrow stromal cell-derived)                                                           | unknown             | other                   |
| NCF2       | 1.444 | 2.85E-03 | neutrophil cytosolic factor 2                                                                                 | Cytoplasm           | enzyme                  |
| ATP5L      | 1.443 | 4.44E-03 | ATP synthase, H <sup>+</sup> transporting, mitochondrial Fo complex, subunit G                                | Cytoplasm           | transporter             |
| ICAM3      | 1.442 | 9.14E-05 | intercellular adhesion molecule 3                                                                             | Plasma Membrane     | other                   |
| DPH5       | 1.441 | 5.64E-04 | DPH5 homolog (S. cerevisiae)                                                                                  | unknown             | enzyme                  |
| GLB1       | 1.441 | 2.67E-04 | galactosidase, beta 1                                                                                         | Cytoplasm           | enzyme                  |
| GMFR2      | 1.440 | 9.89E-06 | guanosine monophosphate reductase 2                                                                           | Cytoplasm           | enzyme                  |
| NMRAL1     | 1.440 | 1.97E-04 | NmrA-like family domain containing 1                                                                          | unknown             | other                   |
| PFKP       | 1.440 | 9.27E-03 | phosphofructokinase, platelet                                                                                 | Cytoplasm           | kinase                  |
| DPAGT1     | 1.439 | 4.01E-04 | dolichyl-phosphate (UDP-N-acetylglucosamine) N-acetylglucosaminophosphotransferase 1 (GlcNAc-1-P transferase) | Cytoplasm           | enzyme                  |
| RINL       | 1.439 | 2.48E-04 | Ras and Rab interactor-like                                                                                   | unknown             | other                   |
| GUCY2C     | 1.438 | 1.86E-03 | guanylate cyclase 2C (heat stable enterotoxin receptor)                                                       | Plasma Membrane     | kinase                  |
| C15orf52   | 1.436 | 5.16E-03 | chromosome 15 open reading frame 52                                                                           | unknown             | other                   |
| CORO1A     | 1.435 | 1.36E-03 | coronin, actin binding protein, 1A                                                                            | Cytoplasm           | other                   |
| ACAP1      | 1.434 | 1.57E-03 | ArfGAP with coiled-coil, ankyrin repeat and PH domains 1                                                      | Nucleus             | other                   |
| DYNLL1     | 1.434 | 4.70E-03 | dynein, light chain, LC8-type 1                                                                               | Cytoplasm           | other                   |
| EEF2K      | 1.434 | 1.59E-03 | eukaryotic elongation factor-2 kinase                                                                         | Cytoplasm           | kinase                  |
| LDLRAP1    | 1.434 | 2.06E-03 | low density lipoprotein receptor adaptor protein 1                                                            | Cytoplasm           | transporter             |
| ADCY3      | 1.433 | 8.53E-03 | adenylate cyclase 3                                                                                           | Plasma Membrane     | enzyme                  |
| TNFAIP8    | 1.433 | 4.01E-03 | tumor necrosis factor, alpha-induced protein 8                                                                | Cytoplasm           | other                   |
| NCRNA00188 | 1.432 | 2.36E-03 | non-protein coding RNA 188                                                                                    | unknown             | other                   |
| PPP2R5B    | 1.432 | 8.85E-03 | protein phosphatase 2, regulatory subunit B', beta                                                            | Cytoplasm           | phosphatase             |
| RASSF5     | 1.432 | 2.78E-04 | Ras association (RalGDS/AF-6) domain family member 5                                                          | Plasma Membrane     | other                   |
| PPP1R7     | 1.431 | 1.13E-03 | protein phosphatase 1, regulatory (inhibitor) subunit 7                                                       | Nucleus             | phosphatase             |
| ANXA6      | 1.430 | 5.16E-04 | annexin A6                                                                                                    | Plasma Membrane     | other                   |
| C20orf72   | 1.428 | 1.31E-03 | chromosome 20 open reading frame 72                                                                           | Cytoplasm           | other                   |
| CAPZB      | 1.428 | 1.65E-03 | capping protein (actin filament) muscle Z-line, beta                                                          | Cytoplasm           | other                   |
| DRAP1      | 1.428 | 6.04E-03 | DR1-associated protein 1 (negative cofactor 2 alpha)                                                          | Nucleus             | transcription regulator |
| ATP5G2     | 1.427 | 7.40E-04 | ATP synthase, H <sup>+</sup> transporting, mitochondrial Fo complex, subunit C2 (subunit 9)                   | Cytoplasm           | transporter             |
| CAPRIN1    | 1.427 | 8.17E-04 | cell cycle associated protein 1                                                                               | Plasma Membrane     | other                   |
| FAM174B    | 1.426 | 4.02E-03 | family with sequence similarity 174, member B                                                                 | Cytoplasm           | other                   |
| PGM1       | 1.426 | 1.50E-04 | phosphoglucomutase 1                                                                                          | Cytoplasm           | enzyme                  |
| NUDT1      | 1.425 | 1.53E-03 | nudix (nucleoside diphosphate linked moiety X)-type motif 1                                                   | Extracellular Space | phosphatase             |
| TNFRSF1B   | 1.425 | 9.35E-04 | tumor necrosis factor receptor superfamily, member 1B                                                         | Plasma Membrane     | transmembrane receptor  |
| CD86       | 1.424 | 3.30E-03 | CD86 molecule                                                                                                 | Plasma Membrane     | transmembrane receptor  |
| NDUFA10    | 1.423 | 8.67E-05 | NADH dehydrogenase (ubiquinone) 1 alpha subcomplex, 10, 42kDa                                                 | Cytoplasm           | enzyme                  |
| SEC61B     | 1.423 | 4.06E-05 | Sec61 beta subunit                                                                                            | Cytoplasm           | transporter             |
| LASP1      | 1.422 | 1.57E-03 | LIM and SH3 protein 1                                                                                         | Cytoplasm           | transporter             |
| PRDX3      | 1.421 | 2.74E-03 | peroxiredoxin 3                                                                                               | Cytoplasm           | enzyme                  |
| MRPS33     | 1.420 | 2.09E-03 | mitochondrial ribosomal protein S33                                                                           | Cytoplasm           | other                   |

|                            |       |          |                                                                                               |                     |                         |
|----------------------------|-------|----------|-----------------------------------------------------------------------------------------------|---------------------|-------------------------|
| VKORC1                     | 1.418 | 2.51E-03 | vitamin K epoxide reductase complex, subunit 1                                                | Cytoplasm           | enzyme                  |
| ACOT13                     | 1.417 | 1.78E-03 | acyl-CoA thioesterase 13                                                                      | Cytoplasm           | enzyme                  |
| UBE2L6                     | 1.416 | 6.04E-04 | ubiquitin-conjugating enzyme E2L 6                                                            | Cytoplasm           | enzyme                  |
| COX5A                      | 1.415 | 7.28E-05 | cytochrome c oxidase subunit Va                                                               | Cytoplasm           | enzyme                  |
| GPI                        | 1.415 | 2.49E-04 | glucose-6-phosphate isomerase                                                                 | Extracellular Space | enzyme                  |
| GSTO1                      | 1.415 | 1.27E-03 | glutathione S-transferase omega 1                                                             | Cytoplasm           | enzyme                  |
| STYXL1                     | 1.415 | 9.79E-04 | serine/threonine/tyrosine interacting-like 1                                                  | unknown             | phosphatase             |
| SH3KBP1                    | 1.414 | 1.22E-04 | SH3-domain kinase binding protein 1                                                           | Cytoplasm           | other                   |
| VARS                       | 1.414 | 7.40E-05 | valyl-tRNA synthetase                                                                         | Cytoplasm           | enzyme                  |
| DCTPP1                     | 1.413 | 1.04E-04 | dCTP pyrophosphatase 1                                                                        | Cytoplasm           | enzyme                  |
| RTN3                       | 1.412 | 2.53E-04 | reticulon 3                                                                                   | Cytoplasm           | other                   |
| HFC1R1                     | 1.411 | 1.62E-03 | host cell factor C1 regulator 1 (XPO1 dependent)                                              | Nucleus             | other                   |
| TRAPPC6A                   | 1.411 | 1.35E-03 | trafficking protein particle complex 6A                                                       | Cytoplasm           | other                   |
| COTL1                      | 1.410 | 8.38E-03 | coactosin-like 1 (Dictyostelium)                                                              | Cytoplasm           | other                   |
| GNG2                       | 1.410 | 3.39E-03 | guanine nucleotide binding protein (G protein), gamma 2                                       | Plasma Membrane     | enzyme                  |
| SSR2                       | 1.410 | 2.85E-03 | signal sequence receptor, beta (translocon-associated protein beta)                           | Cytoplasm           | other                   |
| NLRC5                      | 1.409 | 3.37E-04 | NLR family, CARD domain containing 5                                                          | Cytoplasm           | other                   |
| MIF                        | 1.408 | 4.46E-03 | macrophage migration inhibitory factor (glycosylation-inhibiting factor)                      | Extracellular Space | cytokine                |
| PRDX2                      | 1.408 | 5.78E-03 | peroxiredoxin 2                                                                               | Cytoplasm           | enzyme                  |
| DHRS1                      | 1.407 | 2.22E-03 | dehydrogenase/reductase (SDR family) member 1                                                 | Cytoplasm           | enzyme                  |
| CCT3                       | 1.406 | 7.85E-03 | chaperonin containing TCP1, subunit 3 (gamma)                                                 | Cytoplasm           | other                   |
| LOC646817                  | 1.406 | 3.94E-03 | SET nuclear oncogene pseudogene                                                               | unknown             | other                   |
| ADCK2                      | 1.405 | 6.25E-04 | aarF domain containing kinase 2                                                               | Cytoplasm           | kinase                  |
| SPPL2A                     | 1.405 | 1.17E-03 | signal peptide peptidase-like 2A                                                              | Plasma Membrane     | peptidase               |
| MYL12B                     | 1.404 | 2.26E-03 | myosin, light chain 12B, regulatory                                                           | Cytoplasm           | other                   |
| PTPRC                      | 1.404 | 4.74E-03 | protein tyrosine phosphatase, receptor type, C                                                | Plasma Membrane     | phosphatase             |
| DECR1                      | 1.403 | 1.14E-03 | 2,4-dienoyl CoA reductase 1, mitochondrial                                                    | Cytoplasm           | enzyme                  |
| IQCG                       | 1.403 | 9.16E-04 | IQ motif containing G                                                                         | unknown             | other                   |
| SIL1                       | 1.403 | 8.38E-05 | SIL1 homolog, endoplasmic reticulum chaperone (S. cerevisiae)                                 | Cytoplasm           | transporter             |
| NUDT5                      | 1.402 | 2.25E-04 | nudix (nucleoside diphosphate linked moiety X)-type motif 5                                   | Cytoplasm           | phosphatase             |
| COPE                       | 1.401 | 2.55E-03 | coatomer protein complex, subunit epsilon                                                     | Cytoplasm           | transporter             |
| MACF1                      | 1.401 | 3.46E-04 | microtubule-actin crosslinking factor 1                                                       | Cytoplasm           | other                   |
| NNT                        | 1.400 | 2.45E-04 | nicotinamide nucleotide transhydrogenase                                                      | Cytoplasm           | enzyme                  |
| C20orf24                   | 1.399 | 1.55E-03 | chromosome 20 open reading frame 24                                                           | Cytoplasm           | other                   |
| PMPCB                      | 1.399 | 4.06E-03 | peptidase (mitochondrial processing) beta                                                     | Cytoplasm           | peptidase               |
| DPY30                      | 1.398 | 9.46E-04 | dpy-30 homolog (C. elegans)                                                                   | Nucleus             | other                   |
| GSTZ1                      | 1.398 | 6.73E-05 | glutathione transferase zeta 1                                                                | Cytoplasm           | enzyme                  |
| HLA-DRB3 (includes others) | 1.397 | 3.68E-04 | major histocompatibility complex, class II, DR beta 3                                         | Plasma Membrane     | other                   |
| RNASET2                    | 1.396 | 1.99E-03 | ribonuclease T2                                                                               | Cytoplasm           | enzyme                  |
| YBEY                       | 1.396 | 1.38E-03 | ybeY metallopeptidase (putative)                                                              | Cytoplasm           | other                   |
| FOLR2                      | 1.395 | 4.76E-03 | folate receptor 2 (fetal)                                                                     | Plasma Membrane     | transporter             |
| GSTK1                      | 1.395 | 1.90E-03 | glutathione S-transferase kappa 1                                                             | Cytoplasm           | enzyme                  |
| ZNF581                     | 1.395 | 1.80E-03 | zinc finger protein 581                                                                       | Nucleus             | other                   |
| IL12RB1                    | 1.394 | 4.20E-04 | interleukin 12 receptor, beta 1                                                               | Plasma Membrane     | transmembrane receptor  |
| NDUFB7                     | 1.394 | 5.87E-03 | NADH dehydrogenase (ubiquinone) 1 beta subcomplex, 7, 18kDa                                   | Cytoplasm           | enzyme                  |
| AGPAT4                     | 1.393 | 7.71E-03 | 1-acylglycerol-3-phosphate O-acyltransferase 4 (lysophosphatidic acid acyltransferase, delta) | Cytoplasm           | enzyme                  |
| APIG2                      | 1.393 | 8.67E-03 | adaptor-related protein complex 1, gamma 2 subunit                                            | Cytoplasm           | transporter             |
| CAP1                       | 1.393 | 2.61E-03 | CAP, adenylate cyclase-associated protein 1 (yeast)                                           | Plasma Membrane     | other                   |
| CHST7                      | 1.393 | 5.93E-03 | carbohydrate (N-acetylglucosamine 6-O) sulfotransferase 7                                     | Cytoplasm           | enzyme                  |
| DHRS4                      | 1.393 | 1.36E-03 | dehydrogenase/reductase (SDR family) member 4                                                 | Cytoplasm           | enzyme                  |
| MS4A1                      | 1.393 | 3.63E-04 | membrane-spanning 4-domains, subfamily A, member 1                                            | Plasma Membrane     | other                   |
| EIF4E2                     | 1.392 | 1.73E-03 | eukaryotic translation initiation factor 4E family member 2                                   | unknown             | other                   |
| KCNK12                     | 1.392 | 5.37E-03 | potassium channel, subfamily K, member 12                                                     | Plasma Membrane     | ion channel             |
| SPIB                       | 1.392 | 2.89E-03 | Spi-B transcription factor (Spi-1/PU.1 related)                                               | Nucleus             | transcription regulator |
| GPSM1                      | 1.391 | 3.48E-03 | G-protein signaling modulator 1                                                               | Cytoplasm           | other                   |
| SCO2                       | 1.391 | 7.93E-03 | SCO cytochrome oxidase deficient homolog 2 (yeast)                                            | Cytoplasm           | other                   |
| BACE2                      | 1.390 | 4.44E-03 | beta-site APP-cleaving enzyme 2                                                               | Cytoplasm           | peptidase               |
| PDCD2                      | 1.390 | 3.45E-03 | programmed cell death 2                                                                       | Nucleus             | other                   |
| HLA-DQB1 (includes others) | 1.389 | 3.22E-03 | major histocompatibility complex, class II, DQ beta 1                                         | Plasma Membrane     | other                   |
| MRPL1                      | 1.389 | 4.25E-03 | mitochondrial ribosomal protein L1                                                            | Cytoplasm           | other                   |
| PDXP                       | 1.389 | 2.01E-03 | pyridoxal (pyridoxine, vitamin B6) phosphatase                                                | Plasma Membrane     | enzyme                  |

|                         |       |          |                                                                                    |                     |                         |
|-------------------------|-------|----------|------------------------------------------------------------------------------------|---------------------|-------------------------|
| POTEKP                  | 1.389 | 7.41E-04 | POTE ankyrin domain family, member K, pseudogene                                   | unknown             | other                   |
| ATPAF1                  | 1.388 | 6.89E-04 | ATP synthase mitochondrial F1 complex assembly factor 1                            | Cytoplasm           | other                   |
| PMVK                    | 1.388 | 1.90E-04 | phosphomevalonate kinase                                                           | Cytoplasm           | kinase                  |
| ADCY4                   | 1.387 | 4.55E-03 | adenylate cyclase 4                                                                | Plasma Membrane     | enzyme                  |
| AMY1A (includes others) | 1.387 | 1.52E-03 | amylase, alpha 1A (salivary)                                                       | Extracellular Space | enzyme                  |
| ATPIF1                  | 1.387 | 2.59E-04 | ATPase inhibitory factor 1                                                         | Cytoplasm           | other                   |
| RNF135                  | 1.387 | 1.82E-03 | ring finger protein 135                                                            | Cytoplasm           | enzyme                  |
| LRRK2                   | 1.386 | 1.64E-03 | leucine-rich repeat kinase 2                                                       | Cytoplasm           | kinase                  |
| FBXO6                   | 1.385 | 1.29E-03 | F-box protein 6                                                                    | Cytoplasm           | enzyme                  |
| HENMT1                  | 1.385 | 2.81E-03 | HEN1 methyltransferase homolog 1 (Arabidopsis)                                     | unknown             | other                   |
| MYO5A                   | 1.385 | 7.80E-03 | myosin VA (heavy chain 12, myosin)                                                 | Cytoplasm           | enzyme                  |
| PSMA5                   | 1.385 | 1.84E-04 | proteasome (prosome, macropain) subunit, alpha type, 5                             | Cytoplasm           | peptidase               |
| BEST4                   | 1.384 | 4.55E-03 | bestrophin 4                                                                       | Plasma Membrane     | other                   |
| C3orf10                 | 1.384 | 4.52E-03 | chromosome 3 open reading frame 10                                                 | unknown             | other                   |
| DHRS4L1                 | 1.384 | 2.96E-04 | dehydrogenase/reductase (SDR family) member 4 like 1                               | unknown             | other                   |
| PHACTR1                 | 1.384 | 2.82E-03 | phosphatase and actin regulator 1                                                  | Cytoplasm           | other                   |
| ALOX5                   | 1.383 | 2.08E-03 | arachidonate 5-lipoxygenase                                                        | Cytoplasm           | enzyme                  |
| REPS2                   | 1.383 | 8.89E-03 | RALBP1 associated Eps domain containing 2                                          | Cytoplasm           | other                   |
| CNIH                    | 1.382 | 6.56E-03 | cornichon homolog (Drosophila)                                                     | Plasma Membrane     | other                   |
| RPS6KA1                 | 1.382 | 1.98E-04 | ribosomal protein S6 kinase, 90kDa, polypeptide 1                                  | Cytoplasm           | kinase                  |
| DUSP23                  | 1.381 | 2.11E-03 | dual specificity phosphatase 23                                                    | Cytoplasm           | phosphatase             |
| HSD17B8                 | 1.381 | 5.70E-03 | hydroxysteroid (17-beta) dehydrogenase 8                                           | Cytoplasm           | enzyme                  |
| ARL6IP5                 | 1.380 | 1.12E-04 | ADP-ribosylation-like factor 6 interacting protein 5                               | Cytoplasm           | other                   |
| COMT                    | 1.380 | 6.40E-04 | catechol-O-methyltransferase                                                       | Cytoplasm           | enzyme                  |
| PRKAG1                  | 1.380 | 9.51E-03 | protein kinase, AMP-activated, gamma 1 non-catalytic subunit                       | Nucleus             | kinase                  |
| STX11                   | 1.380 | 7.29E-03 | syntaxin 11                                                                        | Plasma Membrane     | transporter             |
| ABHD14A                 | 1.379 | 1.39E-03 | abhydrolase domain containing 14A                                                  | Cytoplasm           | enzyme                  |
| ATP6V1F                 | 1.379 | 3.57E-04 | ATPase, H <sup>+</sup> transporting, lysosomal 14kDa, V1 subunit F                 | Cytoplasm           | transporter             |
| ATIC                    | 1.378 | 3.33E-04 | 5-aminoimidazole-4-carboxamide ribonucleotide formyltransferase/IMP cyclohydrolase | Cytoplasm           | enzyme                  |
| CRYZ                    | 1.378 | 1.07E-03 | crystallin, zeta (quinone reductase)                                               | Cytoplasm           | enzyme                  |
| PHPT1                   | 1.378 | 4.38E-03 | phosphohistidine phosphatase 1                                                     | Cytoplasm           | phosphatase             |
| CD37                    | 1.377 | 7.41E-03 | CD37 molecule                                                                      | Plasma Membrane     | other                   |
| ACN9                    | 1.376 | 8.11E-04 | ACN9 homolog (S. cerevisiae)                                                       | Cytoplasm           | other                   |
| DYRK4                   | 1.376 | 6.05E-03 | dual-specificity tyrosine-(Y)-phosphorylation regulated kinase 4                   | Nucleus             | kinase                  |
| TRAPPC5                 | 1.376 | 5.82E-03 | trafficking protein particle complex 5                                             | Cytoplasm           | other                   |
| ACY1                    | 1.375 | 6.37E-03 | aminoacylase 1                                                                     | Cytoplasm           | peptidase               |
| HLA-G                   | 1.375 | 5.20E-03 | major histocompatibility complex, class I, G                                       | Plasma Membrane     | transmembrane receptor  |
| SNX11                   | 1.373 | 4.95E-04 | sorting nexin 11                                                                   | unknown             | transporter             |
| U2AF1L4                 | 1.373 | 8.81E-03 | U2 small nuclear RNA auxiliary factor 1-like 4                                     | Nucleus             | other                   |
| DDIT4                   | 1.371 | 4.37E-03 | DNA-damage-inducible transcript 4                                                  | Cytoplasm           | other                   |
| QDPR                    | 1.371 | 6.59E-03 | quinoid dihydropteridine reductase                                                 | Cytoplasm           | enzyme                  |
| EIF3I                   | 1.370 | 5.40E-05 | eukaryotic translation initiation factor 3, subunit I                              | Cytoplasm           | translation regulator   |
| PRDX5                   | 1.370 | 5.40E-03 | peroxiredoxin 5                                                                    | Cytoplasm           | enzyme                  |
| CSRP1                   | 1.369 | 1.53E-03 | cysteine and glycine-rich protein 1                                                | Nucleus             | other                   |
| GDI2                    | 1.369 | 4.33E-03 | GDP dissociation inhibitor 2                                                       | Cytoplasm           | other                   |
| ISG15                   | 1.368 | 6.84E-03 | ISG15 ubiquitin-like modifier                                                      | Extracellular Space | other                   |
| LOC642954               | 1.368 | 4.82E-03 | retinoblastoma binding protein 4 pseudogene                                        | unknown             | other                   |
| S100A10                 | 1.368 | 7.50E-03 | S100 calcium binding protein A10                                                   | Cytoplasm           | other                   |
| PHTF1                   | 1.367 | 1.62E-03 | putative homeodomain transcription factor 1                                        | Nucleus             | transcription regulator |
| PSMD7                   | 1.367 | 6.34E-03 | proteasome (prosome, macropain) 26S subunit, non-ATPase, 7                         | Cytoplasm           | other                   |
| MRPL37                  | 1.366 | 7.00E-04 | mitochondrial ribosomal protein L37                                                | Cytoplasm           | enzyme                  |
| SPAG7                   | 1.366 | 8.93E-03 | sperm associated antigen 7                                                         | Nucleus             | other                   |
| PFKM                    | 1.362 | 4.22E-03 | phosphofructokinase, muscle                                                        | Cytoplasm           | kinase                  |
| COX7C                   | 1.359 | 2.43E-03 | cytochrome c oxidase subunit VIIc                                                  | Cytoplasm           | other                   |
| RCN1                    | 1.359 | 3.18E-03 | reticulocalbin 1, EF-hand calcium binding domain                                   | Cytoplasm           | other                   |
| TPST2                   | 1.359 | 8.09E-03 | tyrosylprotein sulfotransferase 2                                                  | Cytoplasm           | enzyme                  |
| ARF3                    | 1.358 | 1.72E-05 | ADP-ribosylation factor 3                                                          | Cytoplasm           | enzyme                  |
| ATP5J2                  | 1.358 | 2.23E-03 | ATP synthase, H <sup>+</sup> transporting, mitochondrial Fo complex, subunit F2    | Cytoplasm           | transporter             |
| CDC123                  | 1.358 | 8.18E-03 | cell division cycle 123 homolog (S. cerevisiae)                                    | Cytoplasm           | other                   |
| DDT                     | 1.358 | 1.56E-03 | D-dopachrome tautomerase                                                           | Cytoplasm           | enzyme                  |
| TNFSF9                  | 1.358 | 7.26E-03 | tumor necrosis factor (ligand) superfamily, member 9                               | Extracellular Space | cytokine                |
| FILIP1L                 | 1.357 | 6.07E-03 | filamin A interacting protein 1-like                                               | Nucleus             | other                   |
| MPV17                   | 1.357 | 3.52E-03 | MpV17 mitochondrial inner membrane protein                                         | Cytoplasm           | other                   |
| NIPSNAP1                | 1.357 | 1.18E-03 | nipsnap homolog 1 (C. elegans)                                                     | Cytoplasm           | enzyme                  |
| SCO1                    | 1.357 | 6.89E-03 | SCO cytochrome oxidase deficient homolog 1 (yeast)                                 | Cytoplasm           | other                   |

|                        |       |          |                                                                                                                  |                     |                         |
|------------------------|-------|----------|------------------------------------------------------------------------------------------------------------------|---------------------|-------------------------|
| ABCC4                  | 1.356 | 1.06E-04 | ATP-binding cassette, sub-family C (CFTR/MRP), member 4                                                          | Plasma Membrane     | transporter             |
| NRAS                   | 1.356 | 2.65E-04 | neuroblastoma RAS viral (v-ras) oncogene homolog                                                                 | Plasma Membrane     | enzyme                  |
| RNF181                 | 1.355 | 2.95E-03 | ring finger protein 181                                                                                          | unknown             | other                   |
| F8A1 (includes others) | 1.354 | 5.52E-04 | coagulation factor VIII-associated (intronic transcript) 1                                                       | Nucleus             | other                   |
| PSTPIP1                | 1.354 | 3.96E-03 | proline-serine-threonine phosphatase interacting protein 1                                                       | Cytoplasm           | other                   |
| CKS1B                  | 1.353 | 4.78E-04 | CDC28 protein kinase regulatory subunit 1B                                                                       | Cytoplasm           | kinase                  |
| HRSP12                 | 1.353 | 2.38E-03 | heat-responsive protein 12                                                                                       | Cytoplasm           | other                   |
| REC8                   | 1.352 | 8.41E-03 | REC8 homolog (yeast)                                                                                             | Nucleus             | other                   |
| TSC22D1                | 1.352 | 3.37E-03 | TSC22 domain family, member 1                                                                                    | Nucleus             | transcription regulator |
| AP1M1                  | 1.351 | 1.10E-03 | adaptor-related protein complex 1, mu 1 subunit                                                                  | Cytoplasm           | transporter             |
| C17orf62               | 1.351 | 8.36E-03 | chromosome 17 open reading frame 62                                                                              | unknown             | other                   |
| PRKCD                  | 1.351 | 4.09E-03 | protein kinase C, delta                                                                                          | Cytoplasm           | kinase                  |
| PSMC5                  | 1.351 | 3.66E-03 | proteasome (prosome, macropain) 26S subunit, ATPase, 5                                                           | Nucleus             | transcription regulator |
| ST8SIA4                | 1.351 | 1.71E-03 | ST8 alpha-N-acetyl-neuraminide alpha-2,8-sialyltransferase 4                                                     | Cytoplasm           | enzyme                  |
| ARHGAP15               | 1.350 | 7.74E-03 | Rho GTPase activating protein 15                                                                                 | Cytoplasm           | other                   |
| ARF5                   | 1.349 | 5.42E-04 | ADP-ribosylation factor 5                                                                                        | Cytoplasm           | transporter             |
| LBH                    | 1.348 | 9.57E-04 | limb bud and heart development homolog (mouse)                                                                   | Nucleus             | transcription regulator |
| MRPL34                 | 1.348 | 1.26E-03 | mitochondrial ribosomal protein L34                                                                              | Cytoplasm           | other                   |
| POMP                   | 1.347 | 1.45E-03 | proteasome maturation protein                                                                                    | Nucleus             | other                   |
| SUMF2                  | 1.347 | 5.56E-04 | sulfatase modifying factor 2                                                                                     | Cytoplasm           | other                   |
| AHNAK                  | 1.346 | 7.71E-04 | AHNAK nucleoprotein                                                                                              | Nucleus             | other                   |
| HADHA                  | 1.346 | 1.00E-04 | hydroxyacyl-CoA dehydrogenase/3-ketoacyl-CoA thiolase/enoyl-CoA hydratase (trifunctional protein), alpha subunit | Cytoplasm           | enzyme                  |
| NDUFA8                 | 1.346 | 2.85E-03 | NADH dehydrogenase (ubiquinone) 1 alpha subcomplex, 8, 19kDa                                                     | Cytoplasm           | enzyme                  |
| SP110                  | 1.346 | 2.88E-03 | SP110 nuclear body protein                                                                                       | Nucleus             | other                   |
| UBE2A                  | 1.346 | 6.71E-03 | ubiquitin-conjugating enzyme E2A (RAD6 homolog)                                                                  | Cytoplasm           | enzyme                  |
| ZNF626                 | 1.346 | 7.10E-03 | zinc finger protein 626                                                                                          | unknown             | other                   |
| CENPV                  | 1.345 | 2.43E-03 | centromere protein V                                                                                             | Nucleus             | other                   |
| MARCH2                 | 1.345 | 4.55E-03 | membrane-associated ring finger (C3HC4) 2                                                                        | Cytoplasm           | enzyme                  |
| UQRFS1                 | 1.345 | 1.04E-03 | ubiquinol-cytochrome c reductase, Rieske iron-sulfur polypeptide 1                                               | Cytoplasm           | enzyme                  |
| COMTD1                 | 1.344 | 4.60E-03 | catechol-O-methyltransferase domain containing 1                                                                 | Plasma Membrane     | enzyme                  |
| DPEP2                  | 1.344 | 7.46E-03 | dipeptidase 2                                                                                                    | Plasma Membrane     | peptidase               |
| ELOVL5                 | 1.344 | 7.69E-03 | ELOVL family member 5, elongation of long chain fatty acids (FEN1/Elo2, SUR4/Elo3-like, yeast)                   | Cytoplasm           | enzyme                  |
| SLC35A4                | 1.344 | 4.79E-03 | solute carrier family 35, member A4                                                                              | unknown             | transporter             |
| LOC146880              | 1.343 | 1.30E-03 | hypothetical LOC146880                                                                                           | unknown             | other                   |
| BOLA3                  | 1.342 | 5.30E-03 | bolA homolog 3 (E. coli)                                                                                         | unknown             | other                   |
| CHEK2                  | 1.342 | 5.86E-04 | CHK2 checkpoint homolog (S. pombe)                                                                               | Nucleus             | kinase                  |
| KPNA2                  | 1.342 | 1.22E-03 | karyopherin alpha 2 (RAG cohort 1, importin alpha 1)                                                             | Nucleus             | transporter             |
| PLSCR3                 | 1.342 | 8.02E-03 | phospholipid scramblase 3                                                                                        | Cytoplasm           | enzyme                  |
| ILK                    | 1.341 | 5.94E-05 | integrin-linked kinase                                                                                           | Plasma Membrane     | kinase                  |
| METTL7A                | 1.341 | 4.01E-03 | methyltransferase like 7A                                                                                        | unknown             | other                   |
| PAICS                  | 1.341 | 3.56E-03 | phosphoribosylaminoimidazole carboxylase, phosphoribosylaminoimidazole succinocarboxamide synthetase             | Cytoplasm           | enzyme                  |
| SLFN11                 | 1.340 | 2.59E-03 | schlafen family member 11                                                                                        | Nucleus             | enzyme                  |
| C3orf75                | 1.339 | 9.12E-04 | chromosome 3 open reading frame 75                                                                               | unknown             | other                   |
| HK1                    | 1.338 | 5.83E-05 | hexokinase 1                                                                                                     | Cytoplasm           | kinase                  |
| LIMS1                  | 1.338 | 2.23E-03 | LIM and senescent cell antigen-like domains 1                                                                    | Cytoplasm           | other                   |
| LOC401397              | 1.338 | 2.31E-03 | hypothetical LOC401397                                                                                           | unknown             | other                   |
| PRMT2                  | 1.338 | 2.33E-03 | protein arginine methyltransferase 2                                                                             | Nucleus             | enzyme                  |
| FLJ33630               | 1.337 | 1.76E-03 | hypothetical LOC644873                                                                                           | unknown             | other                   |
| MAGED1                 | 1.337 | 3.07E-04 | melanoma antigen family D, 1                                                                                     | Plasma Membrane     | transcription regulator |
| TRAPPC4                | 1.337 | 1.77E-03 | trafficking protein particle complex 4                                                                           | Cytoplasm           | other                   |
| ABHD14B                | 1.336 | 4.02E-03 | abhydrolase domain containing 14B                                                                                | Cytoplasm           | enzyme                  |
| BCCIP                  | 1.336 | 2.29E-03 | BRCA2 and CDKN1A interacting protein                                                                             | Nucleus             | other                   |
| ALPK1                  | 1.335 | 2.97E-03 | alpha-kinase 1                                                                                                   | unknown             | kinase                  |
| LRRK1                  | 1.335 | 2.92E-03 | leucine-rich repeat kinase 1                                                                                     | Cytoplasm           | kinase                  |
| FAM102A                | 1.333 | 8.89E-03 | family with sequence similarity 102, member A                                                                    | unknown             | other                   |
| SMTN                   | 1.333 | 4.60E-03 | smoothelin                                                                                                       | Extracellular Space | other                   |
| DCTN2                  | 1.332 | 6.00E-05 | dynactin 2 (p50)                                                                                                 | Cytoplasm           | other                   |
| SEC61G                 | 1.332 | 4.69E-03 | Sec61 gamma subunit                                                                                              | Cytoplasm           | transporter             |
| GGCT                   | 1.331 | 2.23E-03 | gamma-glutamylcyclotransferase                                                                                   | Cytoplasm           | enzyme                  |
| HPS5                   | 1.331 | 3.60E-03 | Hermansky-Pudlak syndrome 5                                                                                      | Cytoplasm           | other                   |
| S100BP                 | 1.331 | 5.16E-03 | S100P binding protein                                                                                            | Nucleus             | other                   |
| MRPL27                 | 1.330 | 5.75E-03 | mitochondrial ribosomal protein L27                                                                              | Cytoplasm           | other                   |
| VDAC1                  | 1.330 | 1.25E-03 | voltage-dependent anion channel 1                                                                                | Cytoplasm           | ion channel             |

|           |       |          |                                                                                                |                     |                         |
|-----------|-------|----------|------------------------------------------------------------------------------------------------|---------------------|-------------------------|
| ATP5B     | 1.329 | 2.72E-03 | ATP synthase, H <sup>+</sup> transporting, mitochondrial F1 complex, beta polypeptide          | Cytoplasm           | transporter             |
| CLYBL     | 1.328 | 7.76E-03 | citrate lyase beta like                                                                        | Cytoplasm           | enzyme                  |
| NIP7      | 1.328 | 3.68E-03 | nuclear import 7 homolog ( <i>S. cerevisiae</i> )                                              | Nucleus             | other                   |
| NIPSNAP3A | 1.328 | 2.86E-03 | nipsnap homolog 3A ( <i>C. elegans</i> )                                                       | Cytoplasm           | other                   |
| RAB4A     | 1.327 | 1.51E-03 | RAB4A, member RAS oncogene family                                                              | Cytoplasm           | enzyme                  |
| TARS      | 1.327 | 9.16E-04 | threonyl-tRNA synthetase                                                                       | Nucleus             | enzyme                  |
| PPP1CA    | 1.326 | 2.28E-03 | protein phosphatase 1, catalytic subunit, alpha isozyme                                        | Cytoplasm           | phosphatase             |
| SLC7A5    | 1.326 | 2.12E-03 | solute carrier family 7 (cationic amino acid transporter, y <sup>+</sup> system), member 5     | Plasma Membrane     | transporter             |
| DDX19B    | 1.324 | 7.59E-04 | DEAD (Asp-Glu-Ala-As) box polypeptide 19B                                                      | Nucleus             | enzyme                  |
| HCLS1     | 1.324 | 1.88E-03 | hematopoietic cell-specific Lyn substrate 1                                                    | Nucleus             | transcription regulator |
| REM2      | 1.324 | 4.81E-04 | RAS (RAD and GEM)-like GTP binding 2                                                           | Plasma Membrane     | enzyme                  |
| BRP44     | 1.323 | 1.39E-04 | brain protein 44                                                                               | Plasma Membrane     | other                   |
| C11orf10  | 1.323 | 1.04E-03 | chromosome 11 open reading frame 10                                                            | unknown             | other                   |
| RTN4      | 1.323 | 1.52E-03 | reticulon 4                                                                                    | Cytoplasm           | other                   |
| SPI1      | 1.323 | 1.86E-03 | spleen focus forming virus (SFFV) proviral integration oncogene spi1                           | Nucleus             | transcription regulator |
| FXYD5     | 1.321 | 1.01E-04 | FXYD domain containing ion transport regulator 5                                               | Plasma Membrane     | ion channel             |
| PSMG2     | 1.321 | 4.20E-03 | proteasome (prosome, macropain) assembly chaperone 2                                           | Nucleus             | other                   |
| WDR12     | 1.321 | 2.72E-03 | WD repeat domain 12                                                                            | Cytoplasm           | other                   |
| CCDC90A   | 1.320 | 2.44E-03 | coiled-coil domain containing 90A                                                              | unknown             | other                   |
| LOC729708 | 1.320 | 4.85E-03 | triosephosphate isomerase 1 pseudogene 1                                                       | unknown             | enzyme                  |
| PSMB7     | 1.320 | 1.46E-03 | proteasome (prosome, macropain) subunit, beta type, 7                                          | Cytoplasm           | peptidase               |
| CBX6      | 1.319 | 1.97E-03 | chromobox homolog 6                                                                            | Nucleus             | other                   |
| CSNK2B    | 1.319 | 4.71E-03 | casein kinase 2, beta polypeptide                                                              | Cytoplasm           | kinase                  |
| DPP3      | 1.319 | 1.00E-04 | dipeptidyl-peptidase 3                                                                         | Cytoplasm           | peptidase               |
| GRSF1     | 1.319 | 2.92E-04 | G-rich RNA sequence binding factor 1                                                           | Cytoplasm           | other                   |
| NIT2      | 1.319 | 2.45E-03 | nitrilase family, member 2                                                                     | Cytoplasm           | enzyme                  |
| NUCB1     | 1.319 | 9.27E-03 | nucleobindin 1                                                                                 | Cytoplasm           | other                   |
| RUVBL1    | 1.319 | 6.82E-04 | RuvB-like 1 ( <i>E. coli</i> )                                                                 | Nucleus             | transcription regulator |
| SIRT5     | 1.319 | 2.24E-03 | sirtuin 5                                                                                      | Cytoplasm           | enzyme                  |
| CAPN1     | 1.318 | 1.75E-03 | calpain 1, (mu/I) large subunit                                                                | Cytoplasm           | peptidase               |
| CYB5D2    | 1.318 | 3.77E-04 | cytochrome b5 domain containing 2                                                              | unknown             | other                   |
| DNAJC15   | 1.318 | 4.23E-05 | DnaJ (Hsp40) homolog, subfamily C, member 15                                                   | Cytoplasm           | other                   |
| MYL12A    | 1.318 | 1.21E-03 | myosin, light chain 12A, regulatory, non-sarcomeric                                            | unknown             | other                   |
| NSMCE2    | 1.318 | 1.08E-03 | non-SMC element 2, MMS21 homolog ( <i>S. cerevisiae</i> )                                      | Nucleus             | other                   |
| PTGES2    | 1.318 | 9.06E-03 | prostaglandin E synthase 2                                                                     | Cytoplasm           | transcription regulator |
| FGGY      | 1.317 | 1.98E-03 | FGGY carbohydrate kinase domain containing                                                     | unknown             | other                   |
| MTHFD1L   | 1.317 | 6.81E-03 | methylenetetrahydrofolate dehydrogenase (NADP <sup>+</sup> dependent) 1-like                   | Cytoplasm           | enzyme                  |
| TXNRD1    | 1.317 | 4.12E-04 | thioredoxin reductase 1                                                                        | Cytoplasm           | enzyme                  |
| BPGM      | 1.316 | 1.39E-03 | 2,3-bisphosphoglycerate mutase                                                                 | unknown             | phosphatase             |
| COX5B     | 1.315 | 3.21E-03 | cytochrome c oxidase subunit Vb                                                                | Cytoplasm           | other                   |
| ARPC5L    | 1.314 | 3.08E-03 | actin related protein 2/3 complex, subunit 5-like                                              | unknown             | other                   |
| C14orf2   | 1.314 | 5.45E-04 | chromosome 14 open reading frame 2                                                             | unknown             | other                   |
| FUCA2     | 1.314 | 8.75E-04 | fucosidase, alpha-L-2, plasma                                                                  | Extracellular Space | enzyme                  |
| BRE       | 1.313 | 5.64E-04 | brain and reproductive organ-expressed (TNFRSF1A modulator)                                    | Cytoplasm           | other                   |
| MAPK1     | 1.313 | 3.32E-03 | mitogen-activated protein kinase 1                                                             | Cytoplasm           | kinase                  |
| MT1A      | 1.313 | 1.45E-03 | metallothionein 1A                                                                             | Cytoplasm           | other                   |
| LILRA4    | 1.312 | 9.38E-03 | leukocyte immunoglobulin-like receptor, subfamily A (with TM domain), member 4                 | Plasma Membrane     | other                   |
| PXMP2     | 1.312 | 4.45E-04 | peroxisomal membrane protein 2, 22kDa                                                          | Cytoplasm           | other                   |
| ST7       | 1.312 | 1.40E-03 | suppression of tumorigenicity 7                                                                | unknown             | other                   |
| CHRNB1    | 1.311 | 9.66E-04 | cholinergic receptor, nicotinic, beta 1 (muscle)                                               | Plasma Membrane     | transmembrane receptor  |
| DEF6      | 1.311 | 9.57E-03 | differentially expressed in FDCP 6 homolog (mouse)                                             | Extracellular Space | other                   |
| PARK7     | 1.311 | 1.32E-03 | Parkinson disease (autosomal recessive, early onset) 7                                         | Nucleus             | enzyme                  |
| TRIB3     | 1.311 | 3.12E-03 | tribbles homolog 3 ( <i>Drosophila</i> )                                                       | Nucleus             | kinase                  |
| IAH1      | 1.310 | 6.95E-04 | isoamyl acetate-hydrolyzing esterase 1 homolog ( <i>S. cerevisiae</i> )                        | unknown             | other                   |
| MRPL12    | 1.310 | 3.43E-03 | mitochondrial ribosomal protein L12                                                            | Cytoplasm           | other                   |
| MT1X      | 1.310 | 7.67E-04 | metallothionein 1X                                                                             | unknown             | other                   |
| MRPL55    | 1.309 | 6.53E-03 | mitochondrial ribosomal protein L55                                                            | Cytoplasm           | other                   |
| NCKAP1L   | 1.309 | 1.88E-03 | NCK-associated protein 1-like                                                                  | Plasma Membrane     | other                   |
| NEU1      | 1.308 | 8.28E-03 | sialidase 1 (lysosomal sialidase)                                                              | Cytoplasm           | enzyme                  |
| RCAN1     | 1.308 | 1.26E-03 | regulator of calcineurin 1                                                                     | Nucleus             | transcription regulator |
| GALNT1    | 1.307 | 1.03E-04 | UDP-N-acetyl-alpha-D-galactosamine:polypeptide N-acetylgalactosaminyltransferase 1 (GalNAc-T1) | Cytoplasm           | enzyme                  |
| LAMP2     | 1.307 | 1.14E-03 | lysosomal-associated membrane protein 2                                                        | Plasma Membrane     | enzyme                  |
| MCTS1     | 1.307 | 2.58E-03 | malignant T cell amplified sequence 1                                                          | Cytoplasm           | other                   |
| NICN1     | 1.307 | 1.76E-03 | nicolin 1                                                                                      | Nucleus             | other                   |
| PHACTR2   | 1.307 | 3.04E-03 | phosphatase and actin regulator 2                                                              | unknown             | other                   |

|          |       |          |                                                                                          |                 |             |
|----------|-------|----------|------------------------------------------------------------------------------------------|-----------------|-------------|
| PYROXD2  | 1.307 | 3.09E-03 | pyridine nucleotide-disulphide oxidoreductase domain 2                                   | unknown         | other       |
| SH3GLB1  | 1.307 | 8.32E-03 | SH3-domain GRB2-like endophilin B1                                                       | Cytoplasm       | enzyme      |
| WAS      | 1.307 | 1.48E-03 | Wiskott-Aldrich syndrome (eczema-thrombocytopenia)                                       | Cytoplasm       | other       |
| GM2A     | 1.306 | 6.03E-03 | GM2 ganglioside activator                                                                | Cytoplasm       | enzyme      |
| ENDOG    | 1.305 | 2.95E-03 | endonuclease G                                                                           | Cytoplasm       | enzyme      |
| SNX8     | 1.305 | 6.64E-03 | sorting nexin 8                                                                          | unknown         | transporter |
| ATP5C1   | 1.304 | 7.16E-03 | ATP synthase, H <sup>+</sup> transporting, mitochondrial F1 complex, gamma polypeptide 1 | Cytoplasm       | transporter |
| CFL1     | 1.304 | 2.22E-03 | cofilin 1 (non-muscle)                                                                   | Nucleus         | other       |
| GNG5     | 1.304 | 1.27E-03 | guanine nucleotide binding protein (G protein), gamma 5                                  | Plasma Membrane | other       |
| NIPAL3   | 1.304 | 8.43E-05 | NIPA-like domain containing 3                                                            | unknown         | other       |
| SEPT11   | 1.304 | 2.39E-03 | septin 11                                                                                | Nucleus         | other       |
| SIT1     | 1.304 | 3.66E-04 | signaling threshold regulating transmembrane adaptor 1                                   | Plasma Membrane | other       |
| TBCB     | 1.304 | 2.72E-03 | tubulin folding cofactor B                                                               | Cytoplasm       | other       |
| TRAF4    | 1.304 | 8.93E-04 | TNF receptor-associated factor 4                                                         | Cytoplasm       | other       |
| ATP1B3   | 1.303 | 9.35E-03 | ATPase, Na <sup>+</sup> /K <sup>+</sup> transporting, beta 3 polypeptide                 | Plasma Membrane | transporter |
| DNASE1L1 | 1.303 | 4.06E-03 | deoxyribonuclease I-like 1                                                               | Cytoplasm       | enzyme      |
| UQCRH    | 1.303 | 8.87E-03 | ubiquinol-cytochrome c reductase hinge protein                                           | Cytoplasm       | enzyme      |
| CS       | 1.302 | 1.60E-03 | citrate synthase                                                                         | Cytoplasm       | enzyme      |
| DHRS4L2  | 1.302 | 3.51E-05 | dehydrogenase/reductase (SDR family) member 4 like 2                                     | unknown         | other       |
| GSR      | 1.302 | 1.66E-03 | glutathione reductase                                                                    | Cytoplasm       | enzyme      |
| TBCK     | 1.302 | 8.55E-03 | TBC1 domain containing kinase                                                            | unknown         | kinase      |
| ZNHIT1   | 1.302 | 4.76E-04 | zinc finger, HIT-type containing 1                                                       | unknown         | other       |
| COX15    | 1.301 | 2.07E-03 | COX15 homolog, cytochrome c oxidase assembly protein (yeast)                             | Cytoplasm       | enzyme      |
| LSMD1    | 1.301 | 6.18E-04 | LSM domain containing 1                                                                  | unknown         | other       |
| SSR4     | 1.301 | 5.18E-04 | signal sequence receptor, delta (translocon-associated protein delta)                    | Cytoplasm       | other       |
| STARD7   | 1.301 | 5.48E-03 | Star-related lipid transfer (START) domain containing 7                                  | unknown         | other       |

**B.**

| Symbol   | Fold Change | P value  | Entrez Gene Name                                                                               | Location            | Type(s)                           |
|----------|-------------|----------|------------------------------------------------------------------------------------------------|---------------------|-----------------------------------|
| BACH2    | -3.802      | 8.04E-05 | BTB and CNC homology 1, basic leucine zipper transcription factor 2                            | Nucleus             | transcription regulator           |
| CXCR4    | -3.534      | 3.00E-04 | chemokine (C-X-C motif) receptor 4                                                             | Plasma Membrane     | G-protein coupled receptor        |
| ADARB1   | -2.703      | 7.69E-04 | adenosine deaminase, RNA-specific, B1                                                          | Nucleus             | enzyme                            |
| RHPN2    | -2.653      | 2.30E-04 | rhophilin, Rho GTPase binding protein 2                                                        | Cytoplasm           | other                             |
| RXRA     | -2.558      | 8.41E-03 | retinoid X receptor, alpha                                                                     | Nucleus             | ligand-dependent nuclear receptor |
| ABCA1    | -2.421      | 8.99E-04 | ATP-binding cassette, sub-family A (ABC1), member 1                                            | Plasma Membrane     | transporter                       |
| ZC3H12B  | -2.404      | 3.96E-04 | zinc finger CCCH-type containing 12B                                                           | unknown             | other                             |
| ARID5B   | -2.336      | 2.78E-03 | AT rich interactive domain 5B (MRF1-like)                                                      | Nucleus             | transcription regulator           |
| BCL6     | -2.273      | 4.82E-05 | B-cell CLL/lymphoma 6                                                                          | Nucleus             | transcription regulator           |
| HRK      | -2.198      | 3.63E-03 | harakiri, BCL2 interacting protein (contains only BH3 domain)                                  | Cytoplasm           | other                             |
| TCFL5    | -2.092      | 4.92E-04 | transcription factor-like 5 (basic helix-loop-helix)                                           | Nucleus             | transcription regulator           |
| FOXO1    | -2.053      | 1.25E-03 | forkhead box O1                                                                                | Nucleus             | transcription regulator           |
| RAB37    | -2.045      | 1.10E-03 | RAB37, member RAS oncogene family                                                              | Cytoplasm           | enzyme                            |
| IL4R     | -2.004      | 5.53E-04 | interleukin 4 receptor                                                                         | Plasma Membrane     | transmembrane receptor            |
| H1FX     | -1.992      | 1.52E-03 | H1 histone family, member X                                                                    | Nucleus             | other                             |
| IRS2     | -1.984      | 1.68E-03 | insulin receptor substrate 2                                                                   | Cytoplasm           | other                             |
| C7orf50  | -1.931      | 1.25E-03 | chromosome 7 open reading frame 50                                                             | unknown             | other                             |
| LRRC32   | -1.927      | 8.36E-03 | leucine rich repeat containing 32                                                              | Plasma Membrane     | other                             |
| MDK      | -1.887      | 4.01E-03 | midkine (neurite growth-promoting factor 2)                                                    | Extracellular Space | growth factor                     |
| TESC     | -1.876      | 2.31E-03 | tescalcin                                                                                      | Cytoplasm           | other                             |
| MMP11    | -1.869      | 9.40E-04 | matrix metalloproteinase 11 (stromelysin 3)                                                    | Extracellular Space | peptidase                         |
| IL23A    | -1.855      | 2.42E-03 | interleukin 23, alpha subunit p19                                                              | Extracellular Space | cytokine                          |
| KLF11    | -1.848      | 8.07E-04 | Kruppel-like factor 11                                                                         | Nucleus             | transcription regulator           |
| VEZF1    | -1.842      | 1.23E-03 | vascular endothelial zinc finger 1                                                             | Nucleus             | transcription regulator           |
| MLLT6    | -1.825      | 2.07E-03 | myeloid/lymphoid or mixed-lineage leukemia (trithorax homolog, Drosophila); translocated to, 6 | Nucleus             | transcription regulator           |
| FAM3C    | -1.815      | 4.18E-04 | family with sequence similarity 3, member C                                                    | Extracellular Space | cytokine                          |
| FBXO21   | -1.808      | 6.93E-05 | F-box protein 21                                                                               | unknown             | enzyme                            |
| ST3GAL1  | -1.808      | 2.01E-04 | ST3 beta-galactoside alpha-2,3-sialyltransferase 1                                             | Cytoplasm           | enzyme                            |
| CSNK1E   | -1.799      | 2.96E-03 | casein kinase 1, epsilon                                                                       | Cytoplasm           | kinase                            |
| ZNF721   | -1.773      | 9.35E-06 | zinc finger protein 721                                                                        | unknown             | other                             |
| RSBN1    | -1.770      | 1.84E-04 | round spermatid basic protein 1                                                                | Nucleus             | other                             |
| FCRL5    | -1.754      | 8.24E-03 | Fc receptor-like 5                                                                             | unknown             | other                             |
| HERC5    | -1.754      | 2.73E-03 | hect domain and RLD 5                                                                          | Cytoplasm           | enzyme                            |
| FOXO3    | -1.751      | 7.52E-04 | forkhead box O3                                                                                | Nucleus             | transcription regulator           |
| TMEM123  | -1.751      | 7.23E-03 | transmembrane protein 123                                                                      | Plasma Membrane     | other                             |
| CLEC2D   | -1.748      | 2.40E-03 | C-type lectin domain family 2, member D                                                        | Plasma Membrane     | transmembrane receptor            |
| NCK2     | -1.742      | 4.90E-03 | NCK adaptor protein 2                                                                          | Cytoplasm           | kinase                            |
| FLJ20444 | -1.739      | 7.85E-04 | hypothetical protein FLJ20444                                                                  | unknown             | other                             |
| RBM12    | -1.736      | 9.93E-04 | RNA binding motif protein 12                                                                   | Nucleus             | other                             |
| RGS2     | -1.736      | 9.62E-04 | regulator of G-protein signaling 2, 24kDa                                                      | Nucleus             | other                             |
| TXNDC5   | -1.733      | 2.19E-03 | thioredoxin domain containing 5 (endoplasmic reticulum)                                        | Cytoplasm           | enzyme                            |
| KLHL5    | -1.727      | 8.67E-05 | kelch-like 5 (Drosophila)                                                                      | unknown             | other                             |
| SMAD5    | -1.727      | 3.40E-04 | SMAD family member 5                                                                           | Nucleus             | transcription regulator           |
| PPAPDC1B | -1.721      | 6.70E-04 | phosphatidic acid phosphatase type 2 domain containing 1B                                      | unknown             | other                             |
| ZSWIM4   | -1.715      | 6.95E-04 | zinc finger, SWIM-type containing 4                                                            | unknown             | other                             |
| PLEKHA2  | -1.712      | 1.87E-03 | pleckstrin homology domain containing, family A (phosphoinositide binding specific) member 2   | Cytoplasm           | other                             |
| TPD52    | -1.712      | 6.43E-04 | tumor protein D52                                                                              | Cytoplasm           | other                             |
| FCAR     | -1.704      | 1.44E-03 | Fc fragment of IgA, receptor for                                                               | Plasma Membrane     | other                             |



|             |        |          |                                                                                           |                     |                         |
|-------------|--------|----------|-------------------------------------------------------------------------------------------|---------------------|-------------------------|
| MCART1      | -1.701 | 5.56E-03 | mitochondrial carrier triple repeat 1                                                     | Cytoplasm           | other                   |
| NLRP8       | -1.701 | 3.93E-03 | NLR family, pyrin domain containing 8                                                     | unknown             | other                   |
| FXR1        | -1.695 | 1.07E-04 | fragile X mental retardation, autosomal homolog 1                                         | Cytoplasm           | other                   |
| PRPF3       | -1.695 | 1.32E-04 | PRP3 pre-mRNA processing factor 3 homolog (S. cerevisiae)                                 | Nucleus             | other                   |
| RCBTB2      | -1.692 | 2.00E-04 | regulator of chromosome condensation (RCC1) and BTB (POZ) domain containing protein 2     | unknown             | other                   |
| TXNIP       | -1.692 | 8.05E-04 | thioredoxin interacting protein                                                           | Cytoplasm           | other                   |
| FLJ32255    | -1.689 | 1.33E-03 | hypothetical LOC643977                                                                    | unknown             | other                   |
| HIC2        | -1.684 | 1.92E-04 | hypermethylated in cancer 2                                                               | Nucleus             | other                   |
| PER2        | -1.684 | 2.12E-04 | period homolog 2 (Drosophila)                                                             | Nucleus             | other                   |
| ZNF331      | -1.684 | 1.21E-03 | zinc finger protein 331                                                                   | Nucleus             | other                   |
| TNFRSF13C   | -1.681 | 2.49E-04 | tumor necrosis factor receptor superfamily, member 13C                                    | Plasma Membrane     | transmembrane receptor  |
| AUTS2       | -1.678 | 5.38E-03 | autism susceptibility candidate 2                                                         | unknown             | other                   |
| SEMA3E      | -1.675 | 7.94E-03 | sema domain, immunoglobulin domain (Ig), short basic domain, secreted, (semaphorin) 3E    | Extracellular Space | other                   |
| DMC1        | -1.672 | 3.95E-03 | DMC1 dosage suppressor of mck1 homolog, meiosis-specific homologous recombination (yeast) | Nucleus             | enzyme                  |
| BIRC3       | -1.669 | 2.30E-03 | baculoviral IAP repeat containing 3                                                       | Cytoplasm           | enzyme                  |
| IL17RD      | -1.658 | 2.66E-03 | interleukin 17 receptor D                                                                 | Cytoplasm           | other                   |
| WDR19       | -1.658 | 4.88E-04 | WD repeat domain 19                                                                       | Extracellular Space | other                   |
| DBNDD2      | -1.656 | 2.62E-04 | dysbindin (dystrobrevin binding protein 1) domain containing 2                            | Cytoplasm           | other                   |
| FAM46C      | -1.656 | 8.93E-03 | family with sequence similarity 46, member C                                              | Extracellular Space | other                   |
| ALPP/ALPPL2 | -1.653 | 3.16E-03 | alkaline phosphatase, placental                                                           | Plasma Membrane     | phosphatase             |
| LOC648852   | -1.653 | 1.17E-03 | T cell receptor gamma variable 5                                                          | unknown             | other                   |
| RELB        | -1.653 | 9.20E-04 | v-rel reticuloendotheliosis viral oncogene homolog B                                      | Nucleus             | transcription regulator |
| ZNF682      | -1.653 | 2.54E-03 | zinc finger protein 682                                                                   | Nucleus             | other                   |
| FKBP14      | -1.650 | 8.83E-03 | FK506 binding protein 14, 22 kDa                                                          | Cytoplasm           | enzyme                  |
| GMEB2       | -1.650 | 3.59E-05 | glucocorticoid modulatory element binding protein 2                                       | Nucleus             | transcription regulator |
| BCL2        | -1.647 | 9.95E-03 | B-cell CLL/lymphoma 2                                                                     | Cytoplasm           | other                   |
| IFT57       | -1.645 | 1.01E-03 | intraflagellar transport 57 homolog (Chlamydomonas)                                       | Cytoplasm           | other                   |
| TCL1B       | -1.645 | 2.41E-03 | T-cell leukemia/lymphoma 1B                                                               | unknown             | other                   |
| ZNF14       | -1.642 | 6.49E-03 | zinc finger protein 14                                                                    | Nucleus             | transcription regulator |
| B4GALT5     | -1.639 | 4.82E-04 | UDP-Gal:betaGlcNAc beta 1,4- galactosyltransferase, polypeptide 5                         | Cytoplasm           | enzyme                  |
| PDS5B       | -1.639 | 4.56E-04 | PDS5, regulator of cohesion maintenance, homolog B (S. cerevisiae)                        | Nucleus             | other                   |
| ZNF549      | -1.639 | 4.19E-03 | zinc finger protein 549                                                                   | unknown             | other                   |
| DUSP19      | -1.637 | 1.38E-03 | dual specificity phosphatase 19                                                           | Cytoplasm           | phosphatase             |
| UBASH3B     | -1.631 | 6.82E-03 | ubiquitin associated and SH3 domain containing B                                          | unknown             | enzyme                  |
| DNAJC30     | -1.626 | 1.38E-03 | DnaJ (Hsp40) homolog, subfamily C, member 30                                              | Cytoplasm           | other                   |
| MEF2C       | -1.626 | 1.01E-03 | myocyte enhancer factor 2C                                                                | Nucleus             | transcription regulator |
| ABCB1       | -1.621 | 3.86E-03 | ATP-binding cassette, sub-family B (MDR/TAP), member 1                                    | Plasma Membrane     | transporter             |
| COL9A3      | -1.621 | 1.51E-03 | collagen, type IX, alpha 3                                                                | Extracellular Space | other                   |
| KBTBD2      | -1.618 | 6.12E-04 | kelch repeat and BTB (POZ) domain containing 2                                            | unknown             | other                   |
| ZNF394      | -1.618 | 5.02E-03 | zinc finger protein 394                                                                   | Nucleus             | transcription regulator |
| LCMT2       | -1.616 | 9.93E-05 | leucine carboxyl methyltransferase 2                                                      | unknown             | enzyme                  |
| MAGT1       | -1.616 | 4.06E-03 | magnesium transporter 1                                                                   | Plasma Membrane     | enzyme                  |
| SEPN1       | -1.616 | 4.15E-03 | selenoprotein N, 1                                                                        | Cytoplasm           | other                   |
| SHROOM4     | -1.616 | 8.04E-03 | shroom family member 4                                                                    | Plasma Membrane     | other                   |
| GATS        | -1.613 | 1.18E-03 | GATS, stromal antigen 3 opposite strand                                                   | unknown             | other                   |
| GNA12       | -1.610 | 4.24E-03 | guanine nucleotide binding protein (G protein) alpha 12                                   | Plasma Membrane     | enzyme                  |
| LPP         | -1.610 | 1.65E-03 | LIM domain containing preferred translocation partner in lipoma                           | Nucleus             | other                   |
| TIGD5       | -1.610 | 3.71E-03 | tigger transposable element derived 5                                                     | unknown             | other                   |
| ABR         | -1.605 | 2.74E-04 | active BCR-related gene                                                                   | Cytoplasm           | other                   |
| QSOX2       | -1.603 | 2.36E-04 | quiescin Q6 sulfhydryl oxidase 2                                                          | unknown             | enzyme                  |
| ZNF577      | -1.603 | 1.63E-03 | zinc finger protein 577                                                                   | unknown             | other                   |
| FOXP4       | -1.600 | 2.53E-03 | forkhead box P4                                                                           | Nucleus             | transcription regulator |
| KIAA1751    | -1.600 | 4.05E-03 | KIAA1751                                                                                  | unknown             | other                   |
| SPTLC1      | -1.600 | 3.59E-03 | serine palmitoyltransferase, long chain base subunit 1                                    | Cytoplasm           | enzyme                  |
| USP49       | -1.597 | 3.06E-03 | ubiquitin specific peptidase 49                                                           | unknown             | peptidase               |

|                         |        |          |                                                                                    |                     |                         |
|-------------------------|--------|----------|------------------------------------------------------------------------------------|---------------------|-------------------------|
| CHRNA5                  | -1.595 | 5.89E-03 | cholinergic receptor, nicotinic, alpha 5                                           | Plasma Membrane     | transmembrane receptor  |
| FLJ39653                | -1.592 | 7.28E-04 | hypothetical FLJ39653                                                              | unknown             | other                   |
| IL21R                   | -1.592 | 3.90E-03 | interleukin 21 receptor                                                            | Plasma Membrane     | transmembrane receptor  |
| TCF3                    | -1.592 | 1.60E-03 | transcription factor 3 (E2A immunoglobulin enhancer binding factors E12/E47)       | Nucleus             | transcription regulator |
| RYBP                    | -1.587 | 2.94E-03 | RING1 and YY1 binding protein                                                      | Nucleus             | transcription regulator |
| SCMH1                   | -1.587 | 3.15E-04 | sex comb on midleg homolog 1 (Drosophila)                                          | Nucleus             | transcription regulator |
| FAM73A                  | -1.585 | 5.48E-03 | family with sequence similarity 73, member A                                       | unknown             | other                   |
| LYSMD4                  | -1.585 | 1.47E-04 | LysM, putative peptidoglycan-binding, domain containing 4                          | unknown             | other                   |
| XPNPEP3                 | -1.585 | 4.68E-03 | X-prolyl aminopeptidase (aminopeptidase P) 3, putative                             | Cytoplasm           | peptidase               |
| ZNF69                   | -1.585 | 4.60E-03 | zinc finger protein 69                                                             | Nucleus             | other                   |
| ACVR1B                  | -1.582 | 2.45E-04 | activin A receptor, type IB                                                        | Plasma Membrane     | kinase                  |
| C14orf153               | -1.580 | 5.56E-03 | chromosome 14 open reading frame 153                                               | Cytoplasm           | other                   |
| C21orf2                 | -1.575 | 3.46E-04 | chromosome 21 open reading frame 2                                                 | unknown             | other                   |
| GNG7                    | -1.575 | 1.56E-03 | guanine nucleotide binding protein (G protein), gamma 7                            | Plasma Membrane     | enzyme                  |
| LMOD3                   | -1.575 | 4.52E-03 | leiomodoin 3 (fetal)                                                               | unknown             | other                   |
| METTL21A                | -1.572 | 3.26E-03 | methyltransferase like 21A                                                         | unknown             | other                   |
| PHF12                   | -1.572 | 2.36E-05 | PHD finger protein 12                                                              | Nucleus             | transcription regulator |
| PRR24                   | -1.572 | 8.57E-04 | proline rich 24                                                                    | unknown             | other                   |
| C7orf55                 | -1.570 | 3.77E-03 | chromosome 7 open reading frame 55                                                 | Cytoplasm           | other                   |
| SELM                    | -1.570 | 5.46E-04 | selenoprotein M                                                                    | Cytoplasm           | other                   |
| TCF20                   | -1.570 | 4.28E-05 | transcription factor 20 (AR1)                                                      | Nucleus             | transcription regulator |
| CREB1                   | -1.567 | 9.31E-03 | cAMP responsive element binding protein 1                                          | Nucleus             | transcription regulator |
| AHCTF1                  | -1.565 | 8.32E-05 | AT hook containing transcription factor 1                                          | Nucleus             | transcription regulator |
| C9orf130                | -1.565 | 2.30E-03 | chromosome 9 open reading frame 130                                                | unknown             | other                   |
| SESN1                   | -1.565 | 3.61E-03 | sestrin 1                                                                          | Nucleus             | other                   |
| SPEN                    | -1.565 | 5.90E-04 | spen homolog, transcriptional regulator (Drosophila)                               | Nucleus             | transcription regulator |
| LOC400657               | -1.562 | 1.34E-03 | hypothetical LOC400657                                                             | unknown             | other                   |
| NOXA1                   | -1.562 | 2.29E-04 | NADPH oxidase activator 1                                                          | unknown             | other                   |
| C3orf34                 | -1.560 | 4.02E-03 | chromosome 3 open reading frame 34                                                 | unknown             | other                   |
| CATSPER2                | -1.560 | 5.65E-03 | cation channel, sperm associated 2                                                 | Plasma Membrane     | ion channel             |
| RGPD5 (includes others) | -1.560 | 7.00E-03 | RANBP2-like and GRIP domain containing 5                                           | Nucleus             | other                   |
| TDP1                    | -1.560 | 6.31E-03 | tyrosyl-DNA phosphodiesterase 1                                                    | Nucleus             | enzyme                  |
| ZNF548                  | -1.560 | 6.47E-04 | zinc finger protein 548                                                            | unknown             | other                   |
| C15orf63                | -1.558 | 4.34E-03 | chromosome 15 open reading frame 63                                                | unknown             | other                   |
| EPB41L5                 | -1.558 | 4.72E-04 | erythrocyte membrane protein band 4.1 like 5                                       | Plasma Membrane     | other                   |
| ZNF532                  | -1.558 | 4.18E-04 | zinc finger protein 532                                                            | Nucleus             | other                   |
| ANKRD6                  | -1.555 | 4.24E-04 | ankyrin repeat domain 6                                                            | Nucleus             | transcription regulator |
| RTTN                    | -1.555 | 2.76E-04 | rotatin                                                                            | unknown             | other                   |
| SULT1A1                 | -1.555 | 8.00E-03 | sulfotransferase family, cytosolic, 1A, phenol-preferring, member 1                | Cytoplasm           | enzyme                  |
| CRK                     | -1.553 | 1.66E-03 | v-crk sarcoma virus CT10 oncogene homolog (avian)                                  | Cytoplasm           | other                   |
| CSF2RA                  | -1.553 | 2.74E-03 | colony stimulating factor 2 receptor, alpha, low-affinity (granulocyte-macrophage) | Plasma Membrane     | transmembrane receptor  |
| KCNH6                   | -1.553 | 5.01E-03 | potassium voltage-gated channel, subfamily H (eag-related), member 6               | Plasma Membrane     | ion channel             |
| RNF216                  | -1.553 | 8.02E-05 | ring finger protein 216                                                            | Cytoplasm           | other                   |
| LOC440345               | -1.546 | 1.85E-03 | nuclear pore complex interacting protein-like                                      | unknown             | other                   |
| NUAK2                   | -1.543 | 1.29E-04 | NUAK family, SNF1-like kinase, 2                                                   | unknown             | kinase                  |
| ETS1                    | -1.541 | 2.09E-03 | v-ets erythroblastosis virus E26 oncogene homolog 1 (avian)                        | Nucleus             | transcription regulator |
| KHNYN                   | -1.541 | 8.93E-04 | KH and NYN domain containing                                                       | unknown             | other                   |
| RHBDL2                  | -1.541 | 3.33E-03 | rhomboid, veinlet-like 2 (Drosophila)                                              | unknown             | peptidase               |
| NUBPL                   | -1.538 | 3.79E-03 | nucleotide binding protein-like                                                    | Extracellular Space | other                   |
| MYST3                   | -1.536 | 1.94E-04 | MYST histone acetyltransferase (monocytic leukemia) 3                              | Nucleus             | enzyme                  |
| LHFPL2                  | -1.534 | 8.67E-03 | lipoma HMGIC fusion partner-like 2                                                 | unknown             | enzyme                  |
| ZNF223                  | -1.531 | 5.97E-03 | zinc finger protein 223                                                            | Nucleus             | other                   |
| LYST                    | -1.529 | 3.33E-04 | lysosomal trafficking regulator                                                    | Cytoplasm           | transporter             |
| NCRNA00114              | -1.529 | 4.44E-03 | non-protein coding RNA 114                                                         | unknown             | other                   |

|                          |        |          |                                                                                                           |                     |                            |
|--------------------------|--------|----------|-----------------------------------------------------------------------------------------------------------|---------------------|----------------------------|
| BRPF3                    | -1.524 | 1.85E-03 | bromodomain and PHD finger containing, 3                                                                  | Cytoplasm           | other                      |
| IL6ST                    | -1.524 | 1.50E-03 | interleukin 6 signal transducer (gp130, oncostatin M receptor)                                            | Plasma Membrane     | transmembrane receptor     |
| UNK                      | -1.524 | 1.29E-04 | unkempt homolog (Drosophila)                                                                              | Nucleus             | transporter                |
| FAM65A                   | -1.522 | 8.57E-03 | family with sequence similarity 65, member A                                                              | unknown             | other                      |
| FBRSL1                   | -1.522 | 1.61E-03 | fibrosin-like 1                                                                                           | unknown             | other                      |
| HSD17B7                  | -1.522 | 4.57E-03 | hydroxysteroid (17-beta) dehydrogenase 7                                                                  | Cytoplasm           | enzyme                     |
| NPIPL1 (includes others) | -1.522 | 7.23E-05 | nuclear pore complex interacting protein-like 1                                                           | unknown             | other                      |
| PPP1R10                  | -1.522 | 4.43E-03 | protein phosphatase 1, regulatory (inhibitor) subunit 10                                                  | Nucleus             | other                      |
| RYK                      | -1.522 | 1.57E-04 | RYK receptor-like tyrosine kinase                                                                         | Plasma Membrane     | kinase                     |
| MARCH6                   | -1.520 | 6.12E-03 | membrane-associated ring finger (C3HC4) 6                                                                 | Cytoplasm           | enzyme                     |
| PPA2                     | -1.520 | 7.18E-03 | pyrophosphatase (inorganic) 2                                                                             | Cytoplasm           | enzyme                     |
| ZBTB4                    | -1.520 | 1.02E-03 | zinc finger and BTB domain containing 4                                                                   | Nucleus             | other                      |
| ZNF483                   | -1.520 | 5.40E-04 | zinc finger protein 483                                                                                   | Nucleus             | transcription regulator    |
| ZNF614                   | -1.520 | 7.21E-03 | zinc finger protein 614                                                                                   | unknown             | other                      |
| C2orf64                  | -1.517 | 9.16E-06 | chromosome 2 open reading frame 64                                                                        | Cytoplasm           | other                      |
| FGFRL1                   | -1.517 | 8.22E-04 | fibroblast growth factor receptor-like 1                                                                  | Plasma Membrane     | transmembrane receptor     |
| PRKCE                    | -1.517 | 2.32E-03 | protein kinase C, epsilon                                                                                 | Cytoplasm           | kinase                     |
| TNFSF15                  | -1.517 | 1.83E-03 | tumor necrosis factor (ligand) superfamily, member 15                                                     | Extracellular Space | cytokine                   |
| RGS12                    | -1.515 | 5.09E-03 | regulator of G-protein signaling 12                                                                       | Nucleus             | other                      |
| HELQ                     | -1.513 | 6.58E-04 | helicase, POLQ-like                                                                                       | Nucleus             | enzyme                     |
| ZNF470                   | -1.513 | 2.54E-05 | zinc finger protein 470                                                                                   | Nucleus             | other                      |
| ANKRD12                  | -1.508 | 1.11E-03 | ankyrin repeat domain 12                                                                                  | Nucleus             | other                      |
| ICA1                     | -1.508 | 7.55E-03 | islet cell autoantigen 1, 69kDa                                                                           | Cytoplasm           | other                      |
| MCM8                     | -1.508 | 5.01E-03 | minichromosome maintenance complex component 8                                                            | Nucleus             | enzyme                     |
| NOTCH1                   | -1.508 | 7.89E-03 | notch 1                                                                                                   | Plasma Membrane     | transcription regulator    |
| ZNF274                   | -1.508 | 6.37E-05 | zinc finger protein 274                                                                                   | Nucleus             | transcription regulator    |
| HNRNPU                   | -1.506 | 5.70E-03 | heterogeneous nuclear ribonucleoprotein U (scaffold attachment factor A)                                  | Nucleus             | transporter                |
| NUP205                   | -1.506 | 1.11E-04 | nucleoporin 205kDa                                                                                        | Nucleus             | other                      |
| SECISBP2                 | -1.506 | 1.16E-05 | SECIS binding protein 2                                                                                   | Cytoplasm           | translation regulator      |
| LEMD3                    | -1.504 | 4.63E-04 | LEM domain containing 3                                                                                   | Nucleus             | other                      |
| STIM2                    | -1.502 | 5.87E-03 | stromal interaction molecule 2                                                                            | Plasma Membrane     | transporter                |
| TAPT1                    | -1.502 | 8.79E-04 | transmembrane anterior posterior transformation 1                                                         | Plasma Membrane     | G-protein coupled receptor |
| ZNF333                   | -1.502 | 7.03E-05 | zinc finger protein 333                                                                                   | Nucleus             | other                      |
| EIF2C2                   | -1.499 | 1.84E-03 | eukaryotic translation initiation factor 2C, 2                                                            | Cytoplasm           | translation regulator      |
| ERAP2                    | -1.499 | 9.40E-03 | endoplasmic reticulum aminopeptidase 2                                                                    | Cytoplasm           | peptidase                  |
| PPFIA1                   | -1.499 | 1.14E-04 | protein tyrosine phosphatase, receptor type, f polypeptide (PTPRF), interacting protein (liprin), alpha 1 | Plasma Membrane     | phosphatase                |
| WWC3                     | -1.499 | 2.58E-03 | WWC family member 3                                                                                       | unknown             | other                      |
| H3F3A/H3F3B              | -1.497 | 1.47E-03 | H3 histone, family 3B (H3.3B)                                                                             | Nucleus             | other                      |
| C5orf28                  | -1.495 | 2.07E-03 | chromosome 5 open reading frame 28                                                                        | unknown             | other                      |
| PNPT1                    | -1.495 | 3.89E-03 | polyribonucleotide nucleotidyltransferase 1                                                               | Cytoplasm           | enzyme                     |
| SLC35E1                  | -1.495 | 5.81E-03 | solute carrier family 35, member E1                                                                       | unknown             | other                      |
| DFNB31                   | -1.493 | 6.92E-04 | deafness, autosomal recessive 31                                                                          | Plasma Membrane     | other                      |
| HAUS2                    | -1.493 | 7.11E-03 | HAUS augmin-like complex, subunit 2                                                                       | Cytoplasm           | other                      |
| JARID2                   | -1.493 | 2.54E-03 | jumonji, AT rich interactive domain 2                                                                     | Nucleus             | transcription regulator    |
| IRF1                     | -1.490 | 1.04E-03 | interferon regulatory factor 1                                                                            | Nucleus             | transcription regulator    |
| SIRT1                    | -1.490 | 5.60E-04 | sirtuin 1                                                                                                 | Nucleus             | transcription regulator    |
| CHPT1                    | -1.488 | 2.63E-04 | choline phosphotransferase 1                                                                              | unknown             | enzyme                     |
| KLF12                    | -1.488 | 1.89E-03 | Kruppel-like factor 12                                                                                    | Nucleus             | transcription regulator    |
| YRDC                     | -1.488 | 2.65E-04 | yrdC domain containing (E. coli)                                                                          | unknown             | other                      |
| ZNF324/ZNF324 B          | -1.488 | 6.35E-04 | zinc finger protein 324                                                                                   | Nucleus             | other                      |
| DTWD2                    | -1.486 | 8.63E-03 | DTW domain containing 2                                                                                   | unknown             | other                      |
| TCTN1                    | -1.486 | 1.18E-03 | tectonic family member 1                                                                                  | Extracellular Space | other                      |
| TESK2                    | -1.486 | 1.73E-03 | testis-specific kinase 2                                                                                  | Nucleus             | kinase                     |
| ANKRD30B                 | -1.484 | 5.69E-03 | ankyrin repeat domain 30B                                                                                 | unknown             | other                      |

|                             |        |          |                                                                     |                     |                         |
|-----------------------------|--------|----------|---------------------------------------------------------------------|---------------------|-------------------------|
| ARL16                       | -1.484 | 6.58E-03 | ADP-ribosylation factor-like 16                                     | unknown             | other                   |
| CCDC130                     | -1.484 | 2.32E-04 | coiled-coil domain containing 130                                   | unknown             | other                   |
| BLZF1                       | -1.481 | 9.35E-04 | basic leucine zipper nuclear factor 1                               | Cytoplasm           | transcription regulator |
| HTRA4                       | -1.481 | 5.01E-03 | HtrA serine peptidase 4                                             | unknown             | other                   |
| USP42                       | -1.479 | 2.02E-04 | ubiquitin specific peptidase 42                                     | unknown             | peptidase               |
| DYRK1A                      | -1.477 | 1.47E-03 | dual-specificity tyrosine-(Y)-phosphorylation regulated kinase 1A   | Nucleus             | kinase                  |
| HSD17B12                    | -1.477 | 4.12E-04 | hydroxysteroid (17-beta) dehydrogenase 12                           | Cytoplasm           | enzyme                  |
| ZNF665<br>(includes others) | -1.477 | 5.57E-04 | zinc finger protein 665                                             | Nucleus             | other                   |
| GJC1                        | -1.475 | 5.47E-03 | gap junction protein, gamma 1, 45kDa                                | Plasma Membrane     | transporter             |
| PLDN                        | -1.475 | 2.02E-03 | pallidin homolog (mouse)                                            | Cytoplasm           | other                   |
| TRIB1                       | -1.475 | 5.83E-03 | tribbles homolog 1 (Drosophila)                                     | Cytoplasm           | kinase                  |
| ADAM28                      | -1.473 | 7.85E-03 | ADAM metallopeptidase domain 28                                     | Plasma Membrane     | peptidase               |
| GNA11                       | -1.473 | 1.38E-03 | guanine nucleotide binding protein (G protein), alpha 11 (Gq class) | Plasma Membrane     | enzyme                  |
| TUG1                        | -1.473 | 3.89E-04 | taurine upregulated 1 (non-protein coding)                          | unknown             | other                   |
| AHI1                        | -1.471 | 5.70E-04 | Abelson helper integration site 1                                   | unknown             | other                   |
| APBB3                       | -1.471 | 2.32E-03 | amyloid beta (A4) precursor protein-binding, family B, member 3     | Cytoplasm           | other                   |
| CDK9                        | -1.471 | 1.15E-03 | cyclin-dependent kinase 9                                           | Nucleus             | kinase                  |
| EPM2AIP1                    | -1.471 | 1.24E-04 | EPM2A (laforin) interacting protein 1                               | Cytoplasm           | other                   |
| TCL6                        | -1.471 | 8.11E-03 | T-cell leukemia/lymphoma 6 (non-protein coding)                     | unknown             | other                   |
| TDRD1                       | -1.471 | 4.63E-03 | tudor domain containing 1                                           | Cytoplasm           | other                   |
| DDX51                       | -1.468 | 4.61E-03 | DEAD (Asp-Glu-Ala-Asp) box polypeptide 51                           | unknown             | enzyme                  |
| LMO4                        | -1.468 | 1.32E-03 | LIM domain only 4                                                   | Nucleus             | transcription regulator |
| PHAX                        | -1.468 | 8.43E-04 | phosphorylated adaptor for RNA export                               | Cytoplasm           | other                   |
| ZNF786                      | -1.468 | 9.14E-03 | zinc finger protein 786                                             | Nucleus             | other                   |
| B3GALTL                     | -1.466 | 5.07E-03 | beta 1,3-galactosyltransferase-like                                 | unknown             | other                   |
| ATHL1                       | -1.464 | 1.58E-04 | ATH1, acid trehalase-like 1 (yeast)                                 | unknown             | other                   |
| C20orf195                   | -1.464 | 1.78E-03 | chromosome 20 open reading frame 195                                | unknown             | other                   |
| NUP88                       | -1.464 | 7.89E-05 | nucleoporin 88kDa                                                   | Nucleus             | transporter             |
| ZBED5                       | -1.462 | 1.31E-03 | zinc finger, BED-type containing 5                                  | Nucleus             | other                   |
| EIF2AK4                     | -1.460 | 6.49E-03 | eukaryotic translation initiation factor 2 alpha kinase 4           | Cytoplasm           | kinase                  |
| FAM123B                     | -1.460 | 2.90E-04 | family with sequence similarity 123B                                | unknown             | other                   |
| HIVEP1                      | -1.460 | 1.27E-04 | human immunodeficiency virus type I enhancer binding protein 1      | Nucleus             | transcription regulator |
| N4BP2                       | -1.460 | 3.35E-03 | NEDD4 binding protein 2                                             | Cytoplasm           | kinase                  |
| APH1B                       | -1.458 | 5.85E-04 | anterior pharynx defective 1 homolog B (C. elegans)                 | Plasma Membrane     | peptidase               |
| MAP6D1                      | -1.458 | 7.62E-04 | MAP6 domain containing 1                                            | Cytoplasm           | other                   |
| C14orf28                    | -1.453 | 7.18E-05 | chromosome 14 open reading frame 28                                 | unknown             | other                   |
| DNAJB2                      | -1.453 | 9.14E-04 | DnaJ (Hsp40) homolog, subfamily B, member 2                         | Nucleus             | other                   |
| TRIM13                      | -1.453 | 1.71E-03 | tripartite motif containing 13                                      | Cytoplasm           | enzyme                  |
| WDR74                       | -1.453 | 2.30E-03 | WD repeat domain 74                                                 | Nucleus             | other                   |
| ZNF627                      | -1.453 | 9.64E-04 | zinc finger protein 627                                             | unknown             | other                   |
| BCDIN3D                     | -1.451 | 5.19E-04 | BCDIN3 domain containing                                            | unknown             | other                   |
| C16orf48                    | -1.451 | 6.32E-03 | chromosome 16 open reading frame 48                                 | unknown             | other                   |
| MAGOHB                      | -1.451 | 6.04E-04 | magi-nashi homolog B (Drosophila)                                   | Nucleus             | other                   |
| MBTD1                       | -1.451 | 3.97E-03 | mbt domain containing 1                                             | unknown             | other                   |
| MTMR3                       | -1.451 | 1.38E-04 | myotubularin related protein 3                                      | Cytoplasm           | phosphatase             |
| RAB11FIP2                   | -1.451 | 8.57E-05 | RAB11 family interacting protein 2 (class I)                        | Cytoplasm           | other                   |
| SLC25A28                    | -1.451 | 2.58E-04 | solute carrier family 25, member 28                                 | Cytoplasm           | other                   |
| TMEM8B                      | -1.451 | 2.12E-04 | transmembrane protein 8B                                            | Plasma Membrane     | other                   |
| ZNF433                      | -1.451 | 1.08E-03 | zinc finger protein 433                                             | Nucleus             | other                   |
| PLA2G2D                     | -1.449 | 4.54E-03 | phospholipase A2, group IID                                         | Extracellular Space | enzyme                  |
| ANGEL2                      | -1.447 | 1.43E-03 | angel homolog 2 (Drosophila)                                        | Nucleus             | other                   |
| KLF9                        | -1.447 | 1.24E-03 | Kruppel-like factor 9                                               | Nucleus             | transcription regulator |
| LEP                         | -1.447 | 3.51E-03 | leptin                                                              | Extracellular Space | growth factor           |
| NCOA5                       | -1.447 | 2.15E-03 | nuclear receptor coactivator 5                                      | Nucleus             | other                   |
| C3orf37                     | -1.445 | 6.64E-03 | chromosome 3 open reading frame 37                                  | unknown             | other                   |
| NAA16                       | -1.445 | 1.08E-04 | N(alpha)-acetyltransferase 16, NatA auxiliary subunit               | Nucleus             | enzyme                  |
| CTC1                        | -1.443 | 2.89E-03 | CTS telomere maintenance complex component 1                        | Nucleus             | other                   |
| FUBP3                       | -1.443 | 7.21E-03 | far upstream element (FUSE) binding protein 3                       | Nucleus             | transcription regulator |
| TM2D3                       | -1.443 | 8.97E-04 | TM2 domain containing 3                                             | unknown             | other                   |
| ZNF264/ZNF805               | -1.443 | 6.21E-03 | zinc finger protein 264                                             | Nucleus             | other                   |

|           |        |          |                                                                       |                     |                         |
|-----------|--------|----------|-----------------------------------------------------------------------|---------------------|-------------------------|
| AFF4      | -1.441 | 1.79E-04 | AF4/FMR2 family, member 4                                             | Nucleus             | transcription regulator |
| C5orf41   | -1.441 | 8.47E-03 | chromosome 5 open reading frame 41                                    | unknown             | other                   |
| CEP135    | -1.441 | 1.73E-05 | centrosomal protein 135kDa                                            | Cytoplasm           | other                   |
| PDE4C     | -1.441 | 4.98E-03 | phosphodiesterase 4C, cAMP-specific                                   | Cytoplasm           | enzyme                  |
| TRIM39    | -1.439 | 5.96E-04 | tripartite motif containing 39                                        | unknown             | other                   |
| USP7      | -1.439 | 3.08E-03 | ubiquitin specific peptidase 7 (herpes virus-associated)              | Nucleus             | peptidase               |
| ZNF653    | -1.439 | 6.34E-04 | zinc finger protein 653                                               | unknown             | other                   |
| ANKRD11   | -1.437 | 5.47E-04 | ankyrin repeat domain 11                                              | Nucleus             | other                   |
| PRIC285   | -1.437 | 3.60E-03 | peroxisomal proliferator-activated receptor A interacting complex 285 | Nucleus             | transcription regulator |
| ZNF337    | -1.437 | 4.76E-05 | zinc finger protein 337                                               | Nucleus             | other                   |
| IL18      | -1.435 | 2.38E-03 | interleukin 18 (interferon-gamma-inducing factor)                     | Extracellular Space | cytokine                |
| PPM1A     | -1.435 | 1.34E-03 | protein phosphatase, Mg <sup>2+</sup> /Mn <sup>2+</sup> dependent, 1A | Cytoplasm           | phosphatase             |
| SAV1      | -1.435 | 1.78E-04 | salvador homolog 1 (Drosophila)                                       | Cytoplasm           | other                   |
| TNFSF14   | -1.435 | 6.75E-03 | tumor necrosis factor (ligand) superfamily, member 14                 | Extracellular Space | cytokine                |
| UBXN4     | -1.435 | 1.60E-03 | UBX domain protein 4                                                  | Extracellular Space | other                   |
| GABPB2    | -1.433 | 5.00E-03 | GA binding protein transcription factor, beta subunit 2               | Nucleus             | transcription regulator |
| AIRE      | -1.431 | 2.99E-03 | autoimmune regulator                                                  | Nucleus             | transcription regulator |
| ASXL2     | -1.431 | 2.19E-03 | additional sex combs like 2 (Drosophila)                              | unknown             | other                   |
| MPHOSPH8  | -1.431 | 1.38E-05 | M-phase phosphoprotein 8                                              | Nucleus             | transcription regulator |
| PCDHB9    | -1.431 | 5.12E-03 | protocadherin beta 9                                                  | Plasma Membrane     | other                   |
| RPS6KB1   | -1.431 | 1.87E-03 | ribosomal protein S6 kinase, 70kDa, polypeptide 1                     | Cytoplasm           | kinase                  |
| TTC21A    | -1.431 | 6.28E-03 | tetratricopeptide repeat domain 21A                                   | unknown             | other                   |
| IP6K1     | -1.429 | 3.68E-03 | inositol hexakisphosphate kinase 1                                    | Cytoplasm           | kinase                  |
| OGFR      | -1.429 | 6.95E-03 | opioid growth factor receptor                                         | Plasma Membrane     | other                   |
| SPIN4     | -1.429 | 2.60E-03 | spindlin family, member 4                                             | unknown             | other                   |
| ZNF430    | -1.429 | 6.55E-03 | zinc finger protein 430                                               | Nucleus             | other                   |
| AGBL5     | -1.427 | 9.55E-04 | ATP/GTP binding protein-like 5                                        | Cytoplasm           | peptidase               |
| KIAA1875  | -1.427 | 1.00E-03 | KIAA1875                                                              | unknown             | other                   |
| LIN54     | -1.427 | 1.32E-04 | lin-54 homolog (C. elegans)                                           | unknown             | other                   |
| ILF3      | -1.425 | 4.88E-03 | interleukin enhancer binding factor 3, 90kDa                          | Nucleus             | transcription regulator |
| RBM17     | -1.425 | 4.30E-05 | RNA binding motif protein 17                                          | Nucleus             | other                   |
| SDHAL1    | -1.425 | 7.48E-03 | succinate dehydrogenase complex, subunit A, flavoprotein pseudogene 1 | unknown             | other                   |
| SMAD4     | -1.425 | 1.35E-03 | SMAD family member 4                                                  | Nucleus             | transcription regulator |
| ELP2      | -1.422 | 1.10E-03 | elongation protein 2 homolog (S. cerevisiae)                          | Cytoplasm           | other                   |
| ITFG2     | -1.422 | 3.38E-03 | integrin alpha FG-GAP repeat containing 2                             | unknown             | other                   |
| LONP1     | -1.422 | 1.85E-03 | lon peptidase 1, mitochondrial                                        | Cytoplasm           | peptidase               |
| MEPCE     | -1.422 | 1.30E-03 | methylphosphate capping enzyme                                        | unknown             | enzyme                  |
| BCLAF1    | -1.420 | 4.43E-05 | BCL2-associated transcription factor 1                                | Nucleus             | transcription regulator |
| LOC221442 | -1.420 | 3.17E-04 | adenylate cyclase 10 pseudogene                                       | unknown             | other                   |
| PURB      | -1.418 | 1.30E-03 | purine-rich element binding protein B                                 | Nucleus             | transcription regulator |
| CTRL      | -1.416 | 2.23E-03 | chymotrypsin-like                                                     | Extracellular Space | peptidase               |
| HSPA5     | -1.416 | 2.00E-03 | heat shock 70kDa protein 5 (glucose-regulated protein, 78kDa)         | Cytoplasm           | other                   |
| KLHL24    | -1.416 | 2.55E-03 | kelch-like 24 (Drosophila)                                            | unknown             | other                   |
| MKLN1     | -1.416 | 4.80E-05 | muskelin 1, intracellular mediator containing kelch motifs            | Cytoplasm           | other                   |
| CAPN7     | -1.414 | 1.43E-03 | calpain 7                                                             | Cytoplasm           | peptidase               |
| CCNT2     | -1.414 | 2.20E-04 | cyclin T2                                                             | Nucleus             | transcription regulator |
| POFUT2    | -1.414 | 1.97E-05 | protein O-fucosyltransferase 2                                        | Cytoplasm           | enzyme                  |
| CBX7      | -1.412 | 3.94E-03 | chromobox homolog 7                                                   | Nucleus             | other                   |
| FAM63A    | -1.412 | 4.92E-03 | family with sequence similarity 63, member A                          | unknown             | other                   |
| TSC22D2   | -1.412 | 1.13E-03 | TSC22 domain family, member 2                                         | unknown             | other                   |
| ARRDC2    | -1.410 | 1.31E-03 | arrestin domain containing 2                                          | unknown             | other                   |
| FAM20B    | -1.410 | 5.52E-03 | family with sequence similarity 20, member B                          | Extracellular Space | enzyme                  |
| FAM45A    | -1.410 | 1.61E-03 | family with sequence similarity 45, member A                          | unknown             | other                   |
| PPP6R3    | -1.410 | 1.33E-03 | protein phosphatase 6, regulatory subunit 3                           | unknown             | other                   |
| C10orf58  | -1.408 | 3.34E-03 | chromosome 10 open reading frame 58                                   | Extracellular Space | other                   |
| CD47      | -1.408 | 4.84E-04 | CD47 molecule                                                         | Plasma              | other                   |

|              |        |          |                                                                                                           |                     |                                   |
|--------------|--------|----------|-----------------------------------------------------------------------------------------------------------|---------------------|-----------------------------------|
|              |        |          |                                                                                                           | Membrane            |                                   |
| UNKL         | -1.408 | 3.65E-03 | unkempt homolog (Drosophila)-like                                                                         | unknown             | other                             |
| SNORD31      | -1.406 | 1.52E-03 | small nucleolar RNA, C/D box 31                                                                           | unknown             | other                             |
| PRDM4        | -1.404 | 2.12E-04 | PR domain containing 4                                                                                    | Nucleus             | transcription regulator           |
| AHR          | -1.403 | 6.85E-03 | aryl hydrocarbon receptor                                                                                 | Nucleus             | ligand-dependent nuclear receptor |
| CLK1         | -1.403 | 2.27E-04 | CDC-like kinase 1                                                                                         | Nucleus             | kinase                            |
| DNAJC27      | -1.403 | 2.56E-04 | DnaJ (Hsp40) homolog, subfamily C, member 27                                                              | Cytoplasm           | enzyme                            |
| NCOA1        | -1.403 | 9.46E-04 | nuclear receptor coactivator 1                                                                            | Nucleus             | transcription regulator           |
| SNAPC1       | -1.403 | 4.37E-03 | small nuclear RNA activating complex, polypeptide 1, 43kDa                                                | Nucleus             | other                             |
| DMWD         | -1.401 | 4.83E-04 | dystrophia myotonica, WD repeat containing                                                                | Nucleus             | other                             |
| DNAJC28      | -1.401 | 1.52E-03 | DnaJ (Hsp40) homolog, subfamily C, member 28                                                              | unknown             | other                             |
| FANCE        | -1.401 | 5.89E-04 | Fanconi anemia, complementation group E                                                                   | Nucleus             | other                             |
| SLC7A1       | -1.401 | 1.25E-03 | solute carrier family 7 (cationic amino acid transporter, y+ system), member 1                            | Plasma Membrane     | transporter                       |
| C6orf170     | -1.399 | 1.31E-03 | chromosome 6 open reading frame 170                                                                       | unknown             | other                             |
| DDHD2        | -1.399 | 1.78E-04 | DDHD domain containing 2                                                                                  | Cytoplasm           | other                             |
| IL12A        | -1.399 | 2.90E-03 | interleukin 12A (natural killer cell stimulatory factor 1, cytotoxic lymphocyte maturation factor 1, p35) | Extracellular Space | cytokine                          |
| MAFF         | -1.399 | 9.64E-03 | v-maf musculoaponeurotic fibrosarcoma oncogene homolog F (avian)                                          | Nucleus             | transcription regulator           |
| MSH3         | -1.399 | 9.95E-03 | mutS homolog 3 (E. coli)                                                                                  | Nucleus             | enzyme                            |
| MTMR9        | -1.399 | 6.00E-05 | myotubularin related protein 9                                                                            | Cytoplasm           | phosphatase                       |
| POMT2        | -1.399 | 3.17E-05 | protein-O-mannosyltransferase 2                                                                           | Cytoplasm           | enzyme                            |
| ZSWIM6       | -1.399 | 2.09E-04 | zinc finger, SWIM-type containing 6                                                                       | unknown             | other                             |
| LOC100240735 | -1.397 | 1.41E-03 | hypothetical LOC100240735                                                                                 | unknown             | other                             |
| MYOM1        | -1.397 | 1.71E-03 | myomesin 1, 185kDa                                                                                        | Cytoplasm           | other                             |
| NFE2L2       | -1.397 | 9.35E-03 | nuclear factor (erythroid-derived 2)-like 2                                                               | Nucleus             | transcription regulator           |
| TRMT2B       | -1.397 | 5.58E-03 | TRM2 tRNA methyltransferase 2 homolog B (S. cerevisiae)                                                   | Cytoplasm           | enzyme                            |
| PTGR2        | -1.395 | 5.64E-03 | prostaglandin reductase 2                                                                                 | Cytoplasm           | enzyme                            |
| TSC1         | -1.395 | 3.43E-04 | tuberous sclerosis 1                                                                                      | Cytoplasm           | other                             |
| VAPA         | -1.395 | 1.55E-03 | VAMP (vesicle-associated membrane protein)-associated protein A, 33kDa                                    | Plasma Membrane     | other                             |
| DRAM1        | -1.393 | 5.83E-03 | DNA-damage regulated autophagy modulator 1                                                                | unknown             | other                             |
| HIST1H2AH    | -1.393 | 1.97E-03 | histone cluster 1, H2ah                                                                                   | Nucleus             | other                             |
| RAB43        | -1.393 | 5.32E-04 | RAB43, member RAS oncogene family                                                                         | unknown             | other                             |
| RNF103       | -1.393 | 1.36E-03 | ring finger protein 103                                                                                   | Cytoplasm           | enzyme                            |
| TAF4         | -1.393 | 2.37E-03 | TAF4 RNA polymerase II, TATA box binding protein (TBP)-associated factor, 135kDa                          | Nucleus             | transcription regulator           |
| UBE2Q1       | -1.393 | 4.72E-03 | ubiquitin-conjugating enzyme E2Q family member 1                                                          | unknown             | enzyme                            |
| WDR20        | -1.393 | 1.24E-04 | WD repeat domain 20                                                                                       | unknown             | other                             |
| MSH6         | -1.391 | 8.11E-06 | mutS homolog 6 (E. coli)                                                                                  | Nucleus             | enzyme                            |
| SLC6A16      | -1.391 | 4.47E-03 | solute carrier family 6, member 16                                                                        | Plasma Membrane     | transporter                       |
| ZMYND11      | -1.391 | 1.14E-04 | zinc finger, MYND-type containing 11                                                                      | Nucleus             | other                             |
| ZNF791       | -1.391 | 8.09E-03 | zinc finger protein 791                                                                                   | unknown             | other                             |
| BMP8B        | -1.389 | 4.90E-03 | bone morphogenetic protein 8b                                                                             | Extracellular Space | growth factor                     |
| GCFC1        | -1.389 | 7.48E-05 | GC-rich sequence DNA-binding factor 1                                                                     | Nucleus             | other                             |
| ZFP82        | -1.389 | 5.66E-04 | zinc finger protein 82 homolog (mouse)                                                                    | Nucleus             | other                             |
| ZNF529       | -1.389 | 6.46E-04 | zinc finger protein 529                                                                                   | unknown             | other                             |
| CHD7         | -1.387 | 2.14E-04 | chromodomain helicase DNA binding protein 7                                                               | Nucleus             | enzyme                            |
| DYNC1L2      | -1.387 | 6.04E-04 | dynein, cytoplasmic 1, light intermediate chain 2                                                         | Cytoplasm           | other                             |
| RPGR         | -1.385 | 5.21E-03 | retinitis pigmentosa GTPase regulator                                                                     | Cytoplasm           | other                             |
| SHCBP1       | -1.385 | 5.42E-03 | SHC SH2-domain binding protein 1                                                                          | unknown             | other                             |
| TJAP1        | -1.385 | 1.27E-03 | tight junction associated protein 1 (peripheral)                                                          | Plasma Membrane     | other                             |
| ZNF480       | -1.385 | 4.74E-03 | zinc finger protein 480                                                                                   | Nucleus             | other                             |
| BANP         | -1.383 | 1.12E-04 | BTG3 associated nuclear protein                                                                           | Nucleus             | other                             |
| LEMD2        | -1.383 | 1.56E-03 | LEM domain containing 2                                                                                   | Nucleus             | other                             |
| MLL5         | -1.383 | 7.48E-05 | myeloid/lymphoid or mixed-lineage leukemia 5 (trithorax homolog, Drosophila)                              | Nucleus             | enzyme                            |
| ZNF395       | -1.383 | 5.22E-03 | zinc finger protein 395                                                                                   | Cytoplasm           | other                             |
| SPG7         | -1.381 | 3.96E-03 | spastic paraplegia 7 (pure and complicated autosomal recessive)                                           | Cytoplasm           | peptidase                         |
| TACC1        | -1.379 | 7.87E-04 | transforming, acidic coiled-coil containing protein 1                                                     | Nucleus             | other                             |
| FYTTD1       | -1.377 | 8.67E-03 | forty-two-three domain containing 1                                                                       | Nucleus             | other                             |
| SERINC5      | -1.377 | 9.48E-03 | serine incorporator 5                                                                                     | Plasma Membrane     | transporter                       |
| UBL3         | -1.377 | 1.91E-03 | ubiquitin-like 3                                                                                          | Cytoplasm           | other                             |
| CCDC117      | -1.376 | 5.16E-03 | coiled-coil domain containing 117                                                                         | unknown             | other                             |
| DCUN1D5      | -1.376 | 3.36E-04 | DCN1, defective in cullin neddylation 1, domain containing 5 (S. cerevisiae)                              | unknown             | other                             |

|                             |        |          |                                                                                                                  |                        |                               |
|-----------------------------|--------|----------|------------------------------------------------------------------------------------------------------------------|------------------------|-------------------------------|
| ICK                         | -1.376 | 5.96E-03 | intestinal cell (MAK-like) kinase                                                                                | Cytoplasm              | kinase                        |
| SPDYE2<br>(includes others) | -1.376 | 4.03E-03 | speedy homolog E2 ( <i>Xenopus laevis</i> )                                                                      | unknown                | other                         |
| VPS41                       | -1.376 | 7.45E-03 | vacuolar protein sorting 41 homolog ( <i>S. cerevisiae</i> )                                                     | Cytoplasm              | transporter                   |
| CAPRN2                      | -1.374 | 8.11E-04 | caprin family member 2                                                                                           | Cytoplasm              | other                         |
| CDK2                        | -1.374 | 1.42E-03 | cyclin-dependent kinase 2                                                                                        | Nucleus                | kinase                        |
| ARIH2                       | -1.372 | 1.90E-04 | ariadne homolog 2 ( <i>Drosophila</i> )                                                                          | Nucleus                | enzyme                        |
| PHF1                        | -1.372 | 2.67E-03 | PHD finger protein 1                                                                                             | Nucleus                | transcription<br>regulator    |
| C19orf25                    | -1.370 | 7.18E-03 | chromosome 19 open reading frame 25                                                                              | unknown                | other                         |
| CTHF18                      | -1.370 | 3.91E-04 | CTF18, chromosome transmission fidelity factor 18 homolog ( <i>S. cerevisiae</i> )                               | unknown                | other                         |
| CNO                         | -1.370 | 1.16E-03 | cappuccino homolog (mouse)                                                                                       | Cytoplasm              | other                         |
| SRSF7                       | -1.370 | 2.07E-05 | serine/arginine-rich splicing factor 7                                                                           | Nucleus                | other                         |
| ZNF407                      | -1.370 | 1.59E-04 | zinc finger protein 407                                                                                          | Nucleus                | other                         |
| EBLN2                       | -1.368 | 6.30E-03 | endogenous Borna-like N element-2                                                                                | unknown                | other                         |
| TSPYL2                      | -1.368 | 6.11E-04 | TSPY-like 2                                                                                                      | Nucleus                | other                         |
| TUBA1B                      | -1.368 | 3.73E-03 | tubulin, alpha 1b                                                                                                | Cytoplasm              | other                         |
| ULK1                        | -1.368 | 7.73E-04 | unc-51-like kinase 1 ( <i>C. elegans</i> )                                                                       | Cytoplasm              | kinase                        |
| ZHX2                        | -1.368 | 3.64E-03 | zinc fingers and homeoboxes 2                                                                                    | Nucleus                | transcription<br>regulator    |
| ZNF451                      | -1.368 | 4.98E-03 | zinc finger protein 451                                                                                          | Nucleus                | other                         |
| FLYWCH1                     | -1.366 | 3.69E-04 | FLYWCH-type zinc finger 1                                                                                        | unknown                | other                         |
| PCF11                       | -1.366 | 4.74E-03 | PCF11, cleavage and polyadenylation factor subunit, homolog ( <i>S. cerevisiae</i> )                             | Nucleus                | other                         |
| PIGA                        | -1.366 | 2.21E-03 | phosphatidylinositol glycan anchor biosynthesis, class A                                                         | Cytoplasm              | enzyme                        |
| ZNF318                      | -1.366 | 1.85E-03 | zinc finger protein 318                                                                                          | Nucleus                | other                         |
| APPL2                       | -1.364 | 1.19E-04 | adaptor protein, phosphotyrosine interaction, PH domain and leucine zipper containing 2                          | Cytoplasm              | other                         |
| BTBD7                       | -1.364 | 7.60E-05 | BTB (POZ) domain containing 7                                                                                    | unknown                | other                         |
| ELF2                        | -1.364 | 7.66E-05 | E74-like factor 2 (ets domain transcription factor)                                                              | Nucleus                | transcription<br>regulator    |
| FKTN                        | -1.364 | 6.98E-03 | fukutin                                                                                                          | Extracellular<br>Space | other                         |
| ZNF518B                     | -1.364 | 3.56E-03 | zinc finger protein 518B                                                                                         | unknown                | other                         |
| ZYG11B                      | -1.362 | 3.17E-03 | zyg-11 homolog B ( <i>C. elegans</i> )                                                                           | unknown                | other                         |
| OCRL                        | -1.361 | 1.82E-03 | oculocerebrorenal syndrome of Lowe                                                                               | Cytoplasm              | phosphatase                   |
| SLC27A1                     | -1.361 | 6.31E-03 | solute carrier family 27 (fatty acid transporter), member 1                                                      | Plasma<br>Membrane     | transporter                   |
| ANKFY1                      | -1.359 | 1.83E-04 | ankyrin repeat and FYVE domain containing 1                                                                      | Nucleus                | transcription<br>regulator    |
| POFUT1                      | -1.359 | 7.06E-03 | protein O-fucosyltransferase 1                                                                                   | Cytoplasm              | enzyme                        |
| PTP4A2                      | -1.359 | 7.21E-03 | protein tyrosine phosphatase type IVA, member 2                                                                  | Plasma<br>Membrane     | phosphatase                   |
| UCKL1                       | -1.359 | 7.74E-05 | uridine-cytidine kinase 1-like 1                                                                                 | Cytoplasm              | kinase                        |
| ZSCAN18                     | -1.359 | 2.76E-03 | zinc finger and SCAN domain containing 18                                                                        | unknown                | other                         |
| ARID4B                      | -1.357 | 9.57E-03 | AT rich interactive domain 4B (RBP1-like)                                                                        | Nucleus                | other                         |
| CLCN6                       | -1.357 | 2.00E-03 | chloride channel 6                                                                                               | Plasma<br>Membrane     | ion channel                   |
| FKRP                        | -1.357 | 4.35E-04 | fukutin related protein                                                                                          | Cytoplasm              | other                         |
| MTX3                        | -1.357 | 6.61E-04 | metaxin 3                                                                                                        | unknown                | other                         |
| SLC25A34                    | -1.357 | 8.17E-04 | solute carrier family 25, member 34                                                                              | Cytoplasm              | other                         |
| DPP9                        | -1.355 | 1.35E-03 | dipeptidyl-peptidase 9                                                                                           | Cytoplasm              | peptidase                     |
| HNRNPM                      | -1.355 | 1.38E-04 | heterogeneous nuclear ribonucleoprotein M                                                                        | Nucleus                | other                         |
| ZCCHC7                      | -1.355 | 1.29E-03 | zinc finger, CCHC domain containing 7                                                                            | unknown                | other                         |
| APPBP2                      | -1.353 | 1.87E-03 | amyloid beta precursor protein (cytoplasmic tail) binding protein 2                                              | Cytoplasm              | other                         |
| GAB1                        | -1.353 | 2.74E-03 | GRB2-associated binding protein 1                                                                                | Cytoplasm              | other                         |
| MAP3K4                      | -1.353 | 2.09E-04 | mitogen-activated protein kinase kinase kinase 4                                                                 | Cytoplasm              | kinase                        |
| NUCKS1                      | -1.353 | 5.85E-03 | nuclear casein kinase and cyclin-dependent kinase substrate 1                                                    | Nucleus                | kinase                        |
| QRICH1                      | -1.353 | 1.04E-04 | glutamine-rich 1                                                                                                 | unknown                | other                         |
| SSTR2                       | -1.353 | 8.79E-03 | somatostatin receptor 2                                                                                          | Plasma<br>Membrane     | G-protein coupled<br>receptor |
| CSNK1G3                     | -1.351 | 7.91E-03 | casein kinase 1, gamma 3                                                                                         | Cytoplasm              | kinase                        |
| IQCB1                       | -1.351 | 2.00E-03 | IQ motif containing B1                                                                                           | Extracellular<br>Space | other                         |
| PAQR3                       | -1.351 | 5.61E-04 | progesterin and adipoQ receptor family member III                                                                | Cytoplasm              | other                         |
| SEMA4F                      | -1.351 | 8.93E-04 | sema domain, immunoglobulin domain (Ig), transmembrane domain (TM) and short cytoplasmic domain, (semaphorin) 4F | Plasma<br>Membrane     | other                         |
| TMEM70                      | -1.351 | 1.65E-03 | transmembrane protein 70                                                                                         | Cytoplasm              | other                         |
| TRIM33                      | -1.351 | 6.90E-04 | tripartite motif containing 33                                                                                   | Nucleus                | transcription<br>regulator    |
| BRPF1                       | -1.350 | 8.43E-04 | bromodomain and PHD finger containing, 1                                                                         | Nucleus                | transporter                   |
| FBXO11                      | -1.350 | 2.36E-04 | F-box protein 11                                                                                                 | Cytoplasm              | enzyme                        |
| FOXO4                       | -1.350 | 1.06E-03 | forkhead box O4                                                                                                  | Nucleus                | transcription<br>regulator    |

|                        |        |          |                                                                               |                 |                         |
|------------------------|--------|----------|-------------------------------------------------------------------------------|-----------------|-------------------------|
| NPIP (includes others) | -1.350 | 1.65E-04 | nuclear pore complex interacting protein                                      | Nucleus         | other                   |
| PAFAH1B1               | -1.350 | 2.92E-03 | platelet-activating factor acetylhydrolase 1b, regulatory subunit 1 (45kDa)   | Cytoplasm       | enzyme                  |
| P14KAP2                | -1.350 | 6.58E-04 | phosphatidylinositol 4-kinase, catalytic, alpha pseudogene 2                  | unknown         | other                   |
| REV1                   | -1.350 | 6.11E-05 | REV1 homolog (S. cerevisiae)                                                  | Nucleus         | enzyme                  |
| TAF1C                  | -1.350 | 1.14E-04 | TATA box binding protein (TBP)-associated factor, RNA polymerase I, C, 110kDa | Nucleus         | transcription regulator |
| ZNF302                 | -1.350 | 7.45E-04 | zinc finger protein 302                                                       | Nucleus         | other                   |
| ZNF500                 | -1.350 | 7.36E-03 | zinc finger protein 500                                                       | Nucleus         | other                   |
| ZZEF1                  | -1.350 | 2.04E-03 | zinc finger, ZZ-type with EF-hand domain 1                                    | unknown         | other                   |
| CHKB                   | -1.348 | 6.95E-03 | choline kinase beta                                                           | unknown         | kinase                  |
| PELI2                  | -1.348 | 4.80E-03 | pellino homolog 2 (Drosophila)                                                | Cytoplasm       | other                   |
| PIGU                   | -1.348 | 5.26E-03 | phosphatidylinositol glycan anchor biosynthesis, class U                      | Cytoplasm       | enzyme                  |
| UTP14C                 | -1.348 | 1.61E-03 | UTP14, U3 small nucleolar ribonucleoprotein, homolog C (yeast)                | Nucleus         | other                   |
| MDC1                   | -1.346 | 2.22E-03 | mediator of DNA-damage checkpoint 1                                           | Nucleus         | other                   |
| NKTR                   | -1.346 | 2.92E-03 | natural killer-tumor recognition sequence                                     | Plasma Membrane | other                   |
| PLAC8                  | -1.346 | 5.92E-03 | placenta-specific 8                                                           | Nucleus         | other                   |
| PLCL2                  | -1.346 | 1.33E-03 | phospholipase C-like 2                                                        | Cytoplasm       | enzyme                  |
| SLC9A8                 | -1.346 | 2.45E-03 | solute carrier family 9 (sodium/hydrogen exchanger), member 8                 | Cytoplasm       | transporter             |
| ZNF136                 | -1.346 | 5.70E-04 | zinc finger protein 136                                                       | Nucleus         | transcription regulator |
| ZNF17                  | -1.346 | 3.06E-04 | zinc finger protein 17                                                        | Nucleus         | other                   |
| CCDC104                | -1.344 | 2.04E-03 | coiled-coil domain containing 104                                             | unknown         | other                   |
| CDK5RAP2               | -1.344 | 7.36E-04 | CDK5 regulatory subunit associated protein 2                                  | Cytoplasm       | other                   |
| RERE                   | -1.344 | 5.22E-03 | arginine-glutamic acid dipeptide (RE) repeats                                 | Nucleus         | other                   |
| BTG2                   | -1.342 | 7.11E-04 | BTG family, member 2                                                          | Nucleus         | transcription regulator |
| CYB5R1                 | -1.342 | 3.36E-04 | cytochrome b5 reductase 1                                                     | Cytoplasm       | enzyme                  |
| MYLIP                  | -1.342 | 2.55E-03 | myosin regulatory light chain interacting protein                             | Cytoplasm       | enzyme                  |
| SETD1A                 | -1.342 | 2.35E-03 | SET domain containing 1A                                                      | Nucleus         | ion channel             |
| BRMS1L                 | -1.340 | 7.05E-04 | breast cancer metastasis-suppressor 1-like                                    | unknown         | other                   |
| KIAA0355               | -1.340 | 3.10E-03 | KIAA0355                                                                      | unknown         | other                   |
| NASP                   | -1.340 | 2.54E-03 | nuclear autoantigenic sperm protein (histone-binding)                         | Nucleus         | other                   |
| USP6NL                 | -1.340 | 1.36E-04 | USP6 N-terminal like                                                          | Plasma Membrane | other                   |
| C10orf12               | -1.339 | 4.15E-03 | chromosome 10 open reading frame 12                                           | unknown         | other                   |
| EPN2                   | -1.339 | 1.91E-03 | epsin 2                                                                       | Cytoplasm       | other                   |
| KIAA1147               | -1.339 | 2.37E-03 | KIAA1147                                                                      | unknown         | other                   |
| PILRB                  | -1.339 | 4.22E-03 | paired immunoglobulin-like type 2 receptor beta                               | Plasma Membrane | other                   |
| SLC44A4                | -1.339 | 9.91E-03 | solute carrier family 44, member 4                                            | Plasma Membrane | other                   |
| ZNF33B                 | -1.339 | 4.12E-03 | zinc finger protein 33B                                                       | Nucleus         | transcription regulator |
| TCF12                  | -1.337 | 1.72E-03 | transcription factor 12                                                       | Nucleus         | transcription regulator |
| TMEM38B                | -1.337 | 2.62E-03 | transmembrane protein 38B                                                     | Nucleus         | other                   |
| XRN1                   | -1.337 | 2.13E-03 | 5'-3' exoribonuclease 1                                                       | Cytoplasm       | enzyme                  |
| ACACB                  | -1.335 | 3.46E-04 | acetyl-CoA carboxylase beta                                                   | Cytoplasm       | enzyme                  |
| BCOR                   | -1.335 | 3.18E-03 | BCL6 corepressor                                                              | Nucleus         | transcription regulator |
| C6orf192               | -1.335 | 9.51E-03 | chromosome 6 open reading frame 192                                           | unknown         | other                   |
| CCDC45                 | -1.335 | 1.59E-03 | coiled-coil domain containing 45                                              | unknown         | other                   |
| MEX3C                  | -1.335 | 3.37E-03 | mex-3 homolog C (C. elegans)                                                  | unknown         | other                   |
| ZNF217                 | -1.335 | 8.45E-03 | zinc finger protein 217                                                       | Nucleus         | transcription regulator |
| ZNF559                 | -1.335 | 6.44E-03 | zinc finger protein 559                                                       | Nucleus         | other                   |
| ZNF669                 | -1.335 | 2.25E-03 | zinc finger protein 669                                                       | unknown         | other                   |
| CDAN1                  | -1.333 | 7.10E-03 | congenital dyserythropoietic anemia, type I                                   | Nucleus         | other                   |
| RASSF6                 | -1.333 | 7.74E-03 | Ras association (RalGDS/AF-6) domain family member 6                          | unknown         | other                   |
| TRRAP                  | -1.333 | 4.21E-03 | transformation/transcription domain-associated protein                        | Nucleus         | transcription regulator |
| CHSY1                  | -1.332 | 2.56E-03 | chondroitin sulfate synthase 1                                                | Cytoplasm       | enzyme                  |
| DCAF16                 | -1.332 | 1.45E-03 | DDB1 and CUL4 associated factor 16                                            | unknown         | other                   |
| DSTYK                  | -1.332 | 6.84E-04 | dual serine/threonine and tyrosine protein kinase                             | Cytoplasm       | kinase                  |
| FBXO38                 | -1.332 | 4.15E-03 | F-box protein 38                                                              | Nucleus         | other                   |
| RNF114                 | -1.332 | 2.15E-03 | ring finger protein 114                                                       | unknown         | other                   |
| WAPAL                  | -1.332 | 7.85E-03 | wings apart-like homolog (Drosophila)                                         | Nucleus         | other                   |
| FAM89A                 | -1.330 | 4.06E-03 | family with sequence similarity 89, member A                                  | unknown         | other                   |
| FLJ10120               | -1.330 | 3.54E-03 | leucine rich repeat containing 37, member A4 (pseudogene)                     | unknown         | other                   |
| FUS                    | -1.330 | 2.47E-03 | fused in sarcoma                                                              | Nucleus         | transcription regulator |
| ICOSLG                 | -1.330 | 2.64E-03 | inducible T-cell co-stimulator ligand                                         | Plasma          | other                   |



|                     |        |          |                                                                                                |                     |                                   |
|---------------------|--------|----------|------------------------------------------------------------------------------------------------|---------------------|-----------------------------------|
|                     |        |          |                                                                                                | Membrane            |                                   |
| LMNB2               | -1.330 | 8.53E-03 | lamin B2                                                                                       | Nucleus             | other                             |
| PHF3                | -1.330 | 5.75E-04 | PHD finger protein 3                                                                           | Nucleus             | other                             |
| RCHY1               | -1.328 | 1.37E-04 | ring finger and CHY zinc finger domain containing 1                                            | Nucleus             | enzyme                            |
| SLC37A3             | -1.328 | 1.22E-03 | solute carrier family 37 (glycerol-3-phosphate transporter), member 3                          | unknown             | transporter                       |
| VAMP4               | -1.328 | 1.41E-04 | vesicle-associated membrane protein 4                                                          | Cytoplasm           | other                             |
| ZFYVE20             | -1.328 | 4.21E-05 | zinc finger, FYVE domain containing 20                                                         | Cytoplasm           | other                             |
| GUCA1B              | -1.326 | 5.77E-04 | guanylate cyclase activator 1B (retina)                                                        | Cytoplasm           | other                             |
| SPHK2               | -1.326 | 5.71E-03 | sphingosine kinase 2                                                                           | Cytoplasm           | kinase                            |
| TAF7                | -1.326 | 5.25E-03 | TAF7 RNA polymerase II, TATA box binding protein (TBP)-associated factor, 55kDa                | Nucleus             | transcription regulator           |
| CIC                 | -1.325 | 1.35E-03 | capicua homolog (Drosophila)                                                                   | unknown             | other                             |
| EML4                | -1.325 | 5.32E-03 | echinoderm microtubule associated protein like 4                                               | Cytoplasm           | other                             |
| UNC50               | -1.325 | 7.76E-05 | unc-50 homolog (C. elegans)                                                                    | Cytoplasm           | other                             |
| USP9X               | -1.325 | 5.11E-03 | ubiquitin specific peptidase 9, X-linked                                                       | Plasma Membrane     | peptidase                         |
| SAP30L              | -1.323 | 5.81E-03 | SAP30-like                                                                                     | unknown             | other                             |
| SLC16A12            | -1.323 | 7.06E-03 | solute carrier family 16, member 12 (monocarboxylic acid transporter 12)                       | unknown             | other                             |
| CNOT6               | -1.321 | 5.60E-03 | CCR4-NOT transcription complex, subunit 6                                                      | Nucleus             | other                             |
| LOC100510692 / NAIP | -1.321 | 2.13E-03 | NLR family, apoptosis inhibitory protein                                                       | unknown             | other                             |
| MLL                 | -1.321 | 2.64E-03 | myeloid/lymphoid or mixed-lineage leukemia (trithorax homolog, Drosophila)                     | Nucleus             | transcription regulator           |
| ZNF20               | -1.321 | 4.03E-03 | zinc finger protein 20                                                                         | Nucleus             | other                             |
| C18orf25            | -1.319 | 8.75E-04 | chromosome 18 open reading frame 25                                                            | unknown             | other                             |
| CHD6                | -1.319 | 5.22E-03 | chromodomain helicase DNA binding protein 6                                                    | Nucleus             | enzyme                            |
| GUSBP1              | -1.319 | 7.96E-03 | glucuronidase, beta pseudogene 1                                                               | unknown             | other                             |
| LOC94431            | -1.319 | 6.19E-04 | RNA polymerase I transcription factor homolog (S. cerevisiae) pseudogene 1                     | unknown             | other                             |
| ZNF350              | -1.319 | 4.88E-03 | zinc finger protein 350                                                                        | Nucleus             | transcription regulator           |
| ZNF544              | -1.319 | 6.18E-04 | zinc finger protein 544                                                                        | Nucleus             | other                             |
| DMTF1               | -1.318 | 1.17E-03 | cyclin D binding myb-like transcription factor 1                                               | Nucleus             | transcription regulator           |
| MGC13098            | -1.318 | 1.63E-03 | polymerase (RNA) II (DNA directed) polypeptide J4, pseudogene                                  | unknown             | other                             |
| RPL7L1              | -1.318 | 4.35E-03 | ribosomal protein L7-like 1                                                                    | Cytoplasm           | transcription regulator           |
| SRRT                | -1.318 | 4.05E-03 | serrate RNA effector molecule homolog (Arabidopsis)                                            | Nucleus             | other                             |
| YTHDC1              | -1.318 | 4.41E-05 | YTH domain containing 1                                                                        | Cytoplasm           | other                             |
| GALNT3              | -1.316 | 2.47E-03 | UDP-N-acetyl-alpha-D-galactosamine:polypeptide N-acetylgalactosaminyltransferase 3 (GalNAc-T3) | Cytoplasm           | enzyme                            |
| L3MBTL3             | -1.316 | 1.91E-03 | l(3)mbl-like 3 (Drosophila)                                                                    | Nucleus             | other                             |
| NFATC3              | -1.316 | 2.90E-03 | nuclear factor of activated T-cells, cytoplasmic, calcineurin-dependent 3                      | Nucleus             | transcription regulator           |
| RBM25               | -1.316 | 2.36E-04 | RNA binding motif protein 25                                                                   | Nucleus             | other                             |
| RRAGA               | -1.316 | 1.06E-04 | Ras-related GTP binding A                                                                      | Cytoplasm           | enzyme                            |
| SETD3               | -1.316 | 6.24E-04 | SET domain containing 3                                                                        | unknown             | other                             |
| SYAP1               | -1.316 | 2.79E-03 | synapse associated protein 1                                                                   | Nucleus             | other                             |
| WDR73               | -1.316 | 9.20E-04 | WD repeat domain 73                                                                            | Extracellular Space | other                             |
| AGPHD1              | -1.314 | 4.62E-03 | aminoglycoside phosphotransferase domain containing 1                                          | unknown             | other                             |
| TSEN34              | -1.314 | 1.04E-03 | tRNA splicing endonuclease 34 homolog (S. cerevisiae)                                          | Nucleus             | enzyme                            |
| FAM39DP             | -1.312 | 4.38E-04 | WAS protein family homolog 3 pseudogene                                                        | Plasma Membrane     | other                             |
| GALC                | -1.312 | 4.88E-04 | galactosylceramidase                                                                           | Cytoplasm           | enzyme                            |
| MGEA5               | -1.312 | 1.46E-04 | meningioma expressed antigen 5 (hyaluronidase)                                                 | Cytoplasm           | enzyme                            |
| NAE1                | -1.312 | 6.11E-05 | NEDD8 activating enzyme E1 subunit 1                                                           | Cytoplasm           | enzyme                            |
| SLC5A8              | -1.312 | 8.79E-03 | solute carrier family 5 (iodide transporter), member 8                                         | Plasma Membrane     | transporter                       |
| ZIK1                | -1.312 | 1.62E-04 | zinc finger protein interacting with K protein 1 homolog (mouse)                               | unknown             | other                             |
| ANKRD44             | -1.311 | 2.56E-03 | ankyrin repeat domain 44                                                                       | unknown             | other                             |
| C11orf63            | -1.311 | 3.16E-03 | chromosome 11 open reading frame 63                                                            | unknown             | other                             |
| KIAA1267            | -1.311 | 3.60E-04 | KIAA1267                                                                                       | Nucleus             | other                             |
| LOC440704           | -1.311 | 5.24E-04 | hypothetical LOC440704                                                                         | unknown             | other                             |
| N4BP2L1             | -1.311 | 3.94E-03 | NEDD4 binding protein 2-like 1                                                                 | unknown             | other                             |
| PAPOLA              | -1.311 | 2.24E-04 | poly(A) polymerase alpha                                                                       | Nucleus             | enzyme                            |
| PGRMC2              | -1.311 | 7.24E-04 | progesterone receptor membrane component 2                                                     | Nucleus             | ligand-dependent nuclear receptor |
| SGK494              | -1.311 | 4.68E-03 | uncharacterized serine/threonine-protein kinase Sgk494                                         | unknown             | kinase                            |
| UBE3C               | -1.311 | 3.84E-03 | ubiquitin protein ligase E3C                                                                   | Nucleus             | enzyme                            |
| USPL1               | -1.311 | 1.82E-04 | ubiquitin specific peptidase like 1                                                            | unknown             | other                             |
| VAMP2               | -1.311 | 5.21E-03 | vesicle-associated membrane protein 2 (synaptobrevin 2)                                        | Plasma Membrane     | other                             |

|           |        |          |                                                                       |                 |                         |
|-----------|--------|----------|-----------------------------------------------------------------------|-----------------|-------------------------|
| BBX       | -1.309 | 1.35E-03 | bobby sox homolog (Drosophila)                                        | Nucleus         | other                   |
| EID3      | -1.309 | 1.38E-03 | EP300 interacting inhibitor of differentiation 3                      | Cytoplasm       | other                   |
| HS3ST1    | -1.309 | 7.93E-03 | heparan sulfate (glucosamine) 3-O-sulfotransferase 1                  | Cytoplasm       | enzyme                  |
| PNPLA2    | -1.309 | 2.64E-03 | patatin-like phospholipase domain containing 2                        | Cytoplasm       | enzyme                  |
| SP2       | -1.309 | 3.26E-03 | Sp2 transcription factor                                              | Nucleus         | transcription regulator |
| WDSUB1    | -1.309 | 5.87E-03 | WD repeat, sterile alpha motif and U-box domain containing 1          | unknown         | other                   |
| ZNF281    | -1.309 | 3.21E-03 | zinc finger protein 281                                               | Nucleus         | transcription regulator |
| CDKN1B    | -1.307 | 8.13E-04 | cyclin-dependent kinase inhibitor 1B (p27, Kip1)                      | Nucleus         | other                   |
| E4F1      | -1.307 | 2.02E-04 | E4F transcription factor 1                                            | Nucleus         | transcription regulator |
| EXOSC2    | -1.307 | 1.02E-03 | exosome component 2                                                   | Nucleus         | enzyme                  |
| LEPROTL1  | -1.307 | 2.12E-03 | leptin receptor overlapping transcript-like 1                         | Plasma Membrane | other                   |
| RBM26     | -1.307 | 8.38E-05 | RNA binding motif protein 26                                          | unknown         | other                   |
| SNX27     | -1.307 | 2.22E-03 | sorting nexin family member 27                                        | unknown         | other                   |
| ZRSR2     | -1.307 | 7.06E-04 | zinc finger (CCCH type), RNA-binding motif and serine/arginine rich 2 | Nucleus         | other                   |
| DNAJB6    | -1.305 | 5.83E-05 | DnaJ (Hsp40) homolog, subfamily B, member 6                           | Nucleus         | transcription regulator |
| LOC286437 | -1.305 | 2.23E-03 | hypothetical protein LOC286437                                        | unknown         | other                   |
| C16orf58  | -1.304 | 1.95E-03 | chromosome 16 open reading frame 58                                   | unknown         | other                   |
| ZNF146    | -1.304 | 9.40E-03 | zinc finger protein 146                                               | Nucleus         | other                   |
| C12orf41  | -1.302 | 8.34E-05 | chromosome 12 open reading frame 41                                   | unknown         | other                   |
| MAN1C1    | -1.302 | 1.24E-04 | mannosidase, alpha, class 1C, member 1                                | Cytoplasm       | enzyme                  |
| MYO3B     | -1.302 | 1.95E-03 | myosin IIIB                                                           | unknown         | kinase                  |
| PPIG      | -1.302 | 3.30E-03 | peptidylprolyl isomerase G (cyclophilin G)                            | Nucleus         | enzyme                  |
| SNORD14A  | -1.302 | 6.76E-03 | small nucleolar RNA, C/D box 14A                                      | unknown         | other                   |
